# Supplementary material for: Quality Assessment and Data Analysis for microRNA Expression Arrays
Source: PubMed Central journal article supplement — Nucleic Acids Res. 2008 Dec 22;37(2):e17. doi: 10.1093/nar/gkn932 (PMC2632898; doi:10.1093/nar/gkn932), 2008-12-22

# hsa-miR-146b

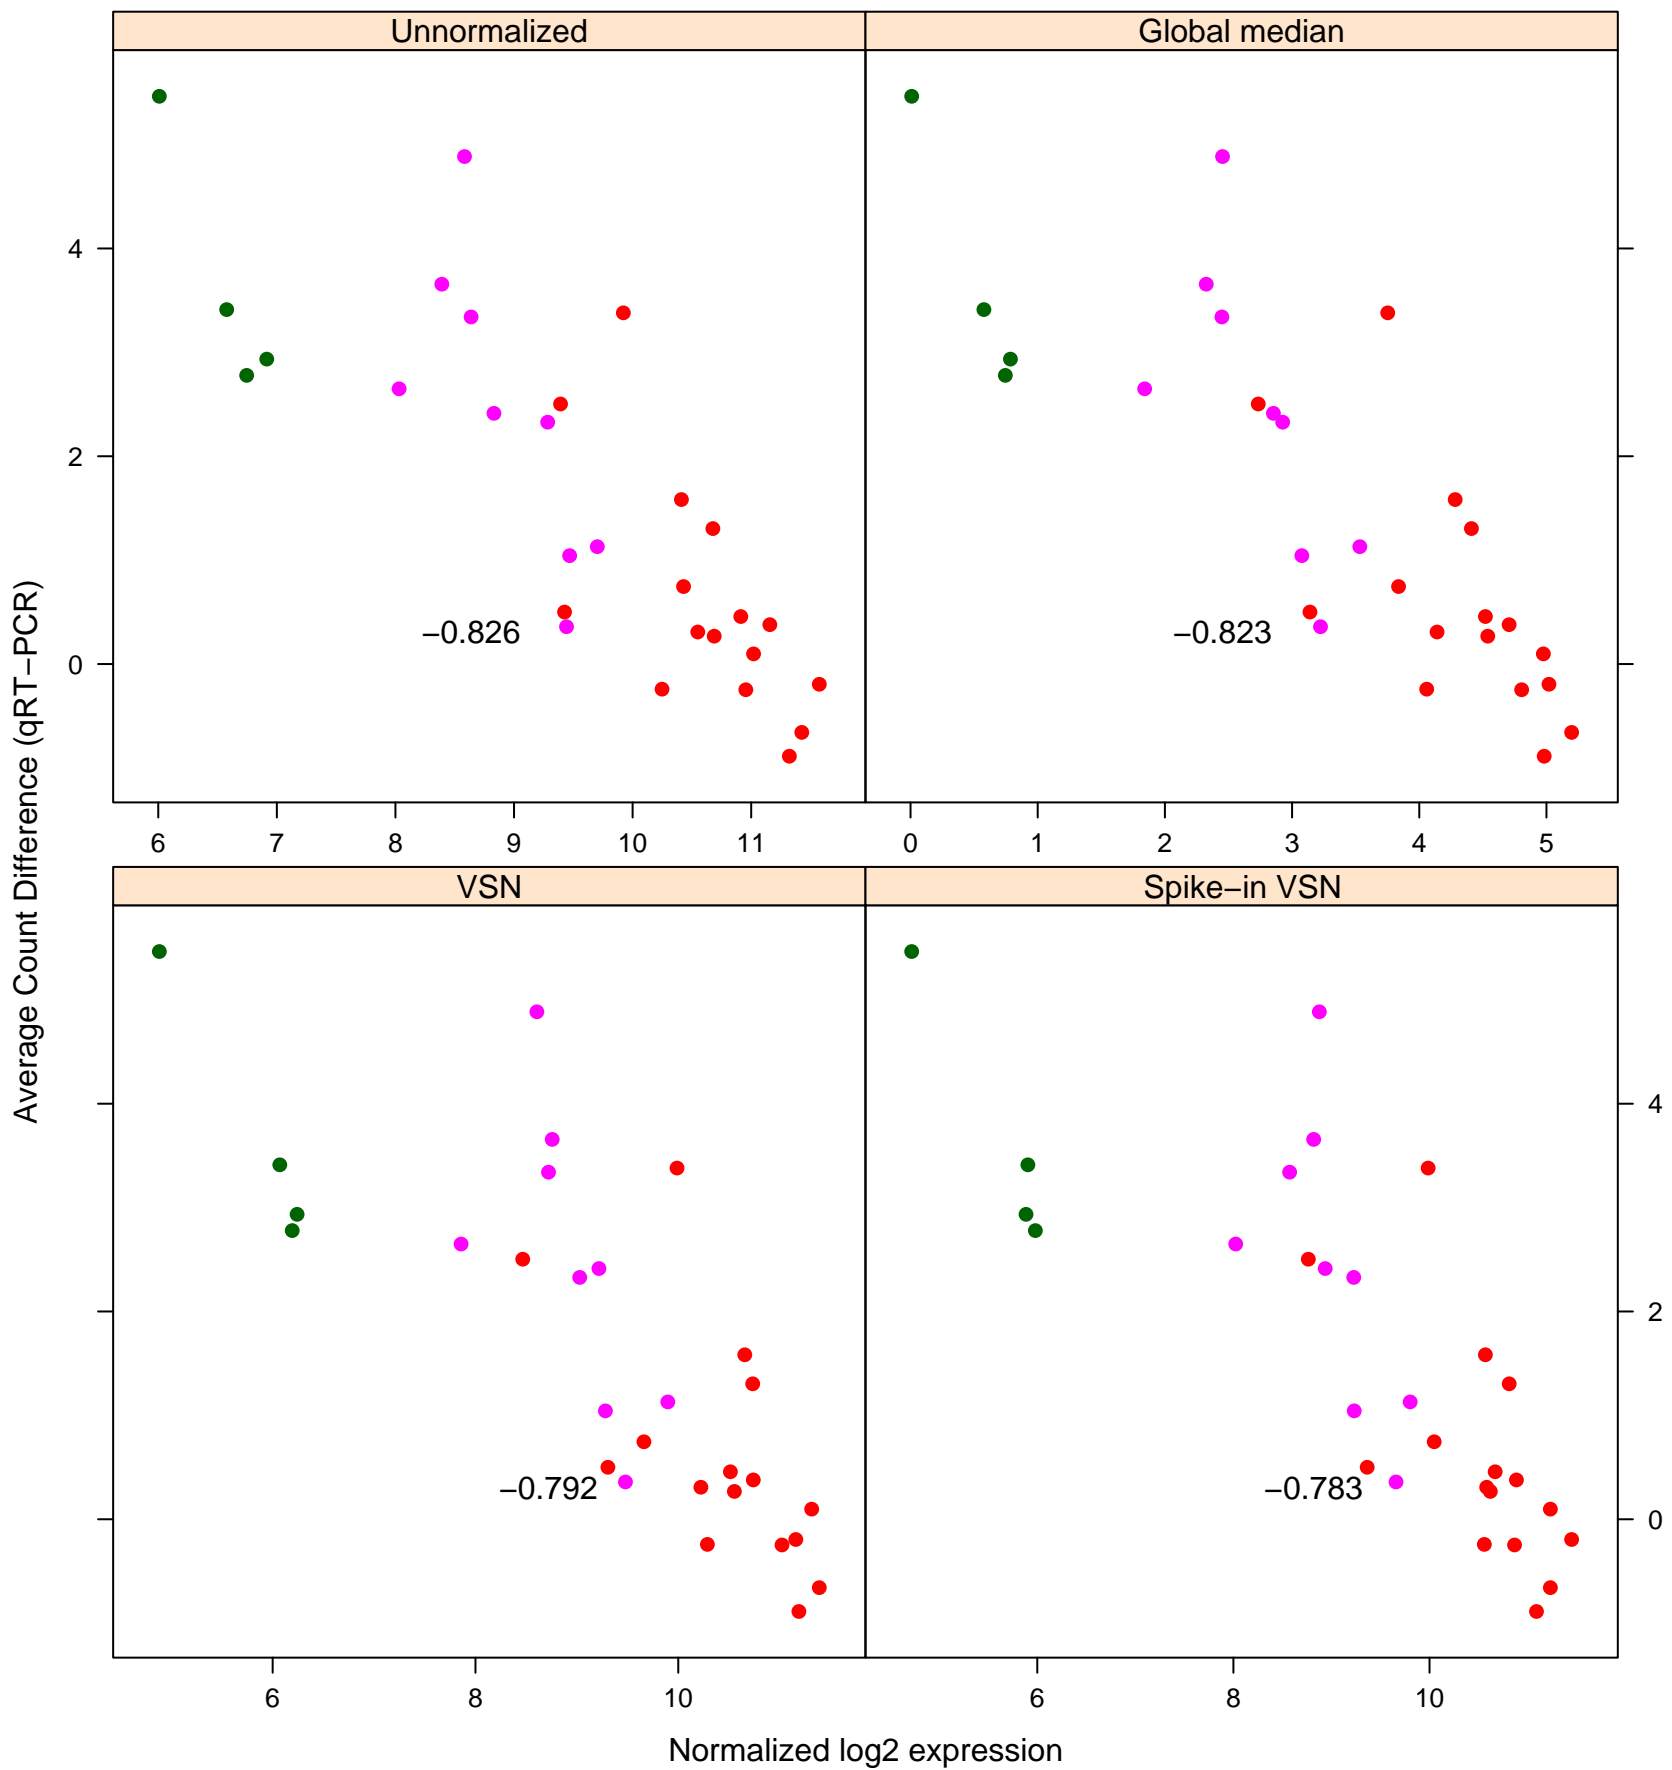

# hsa-miR-205

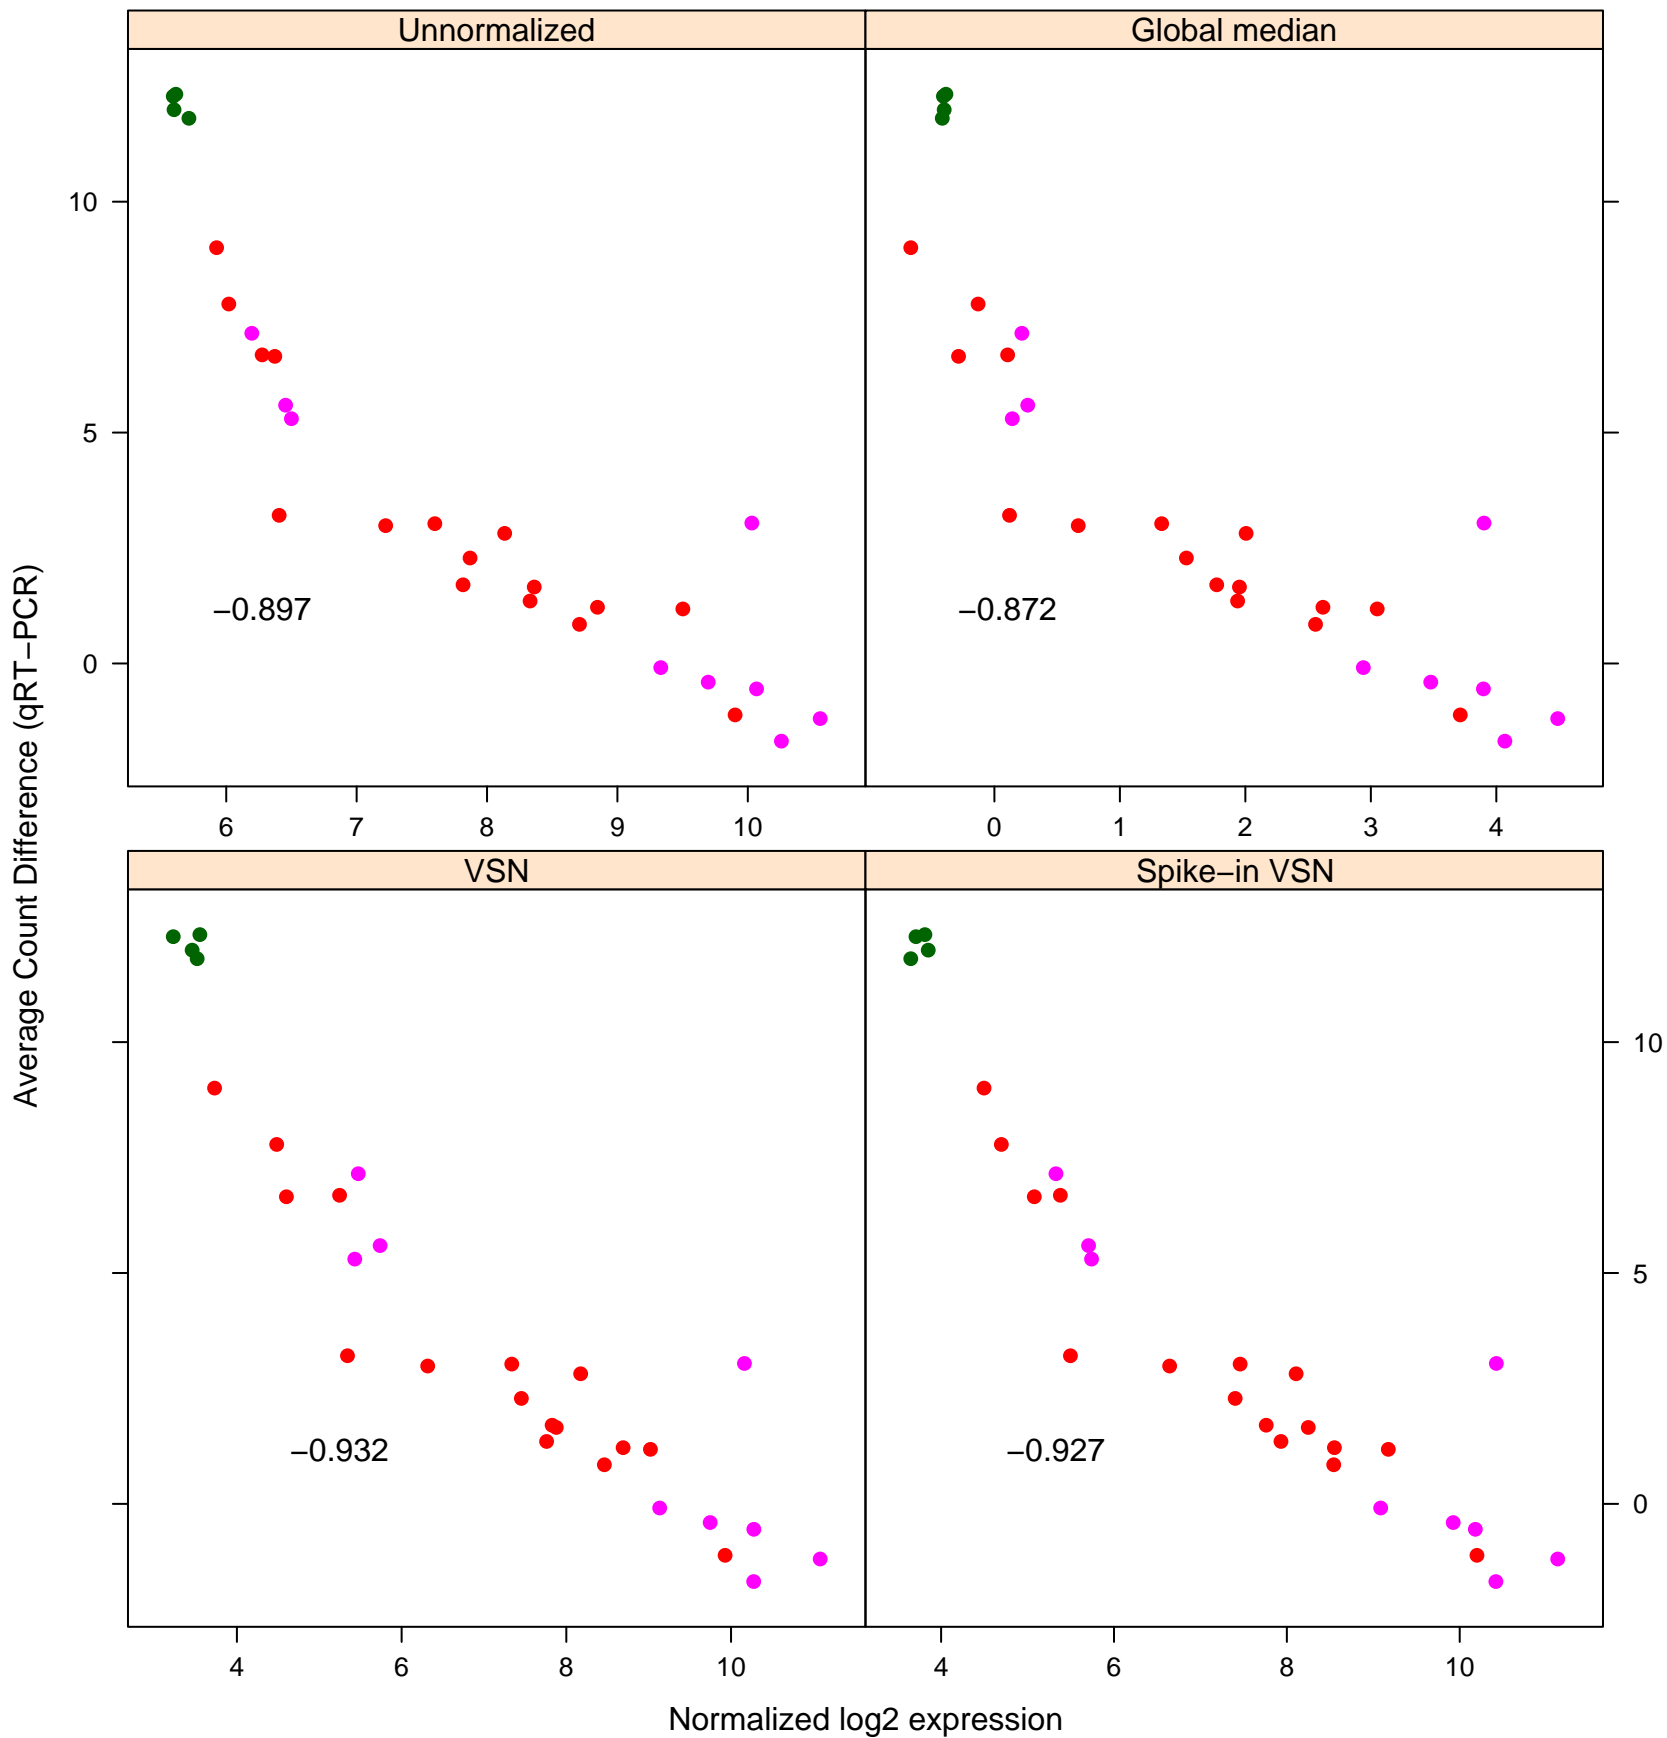

# hsa-miR-200a

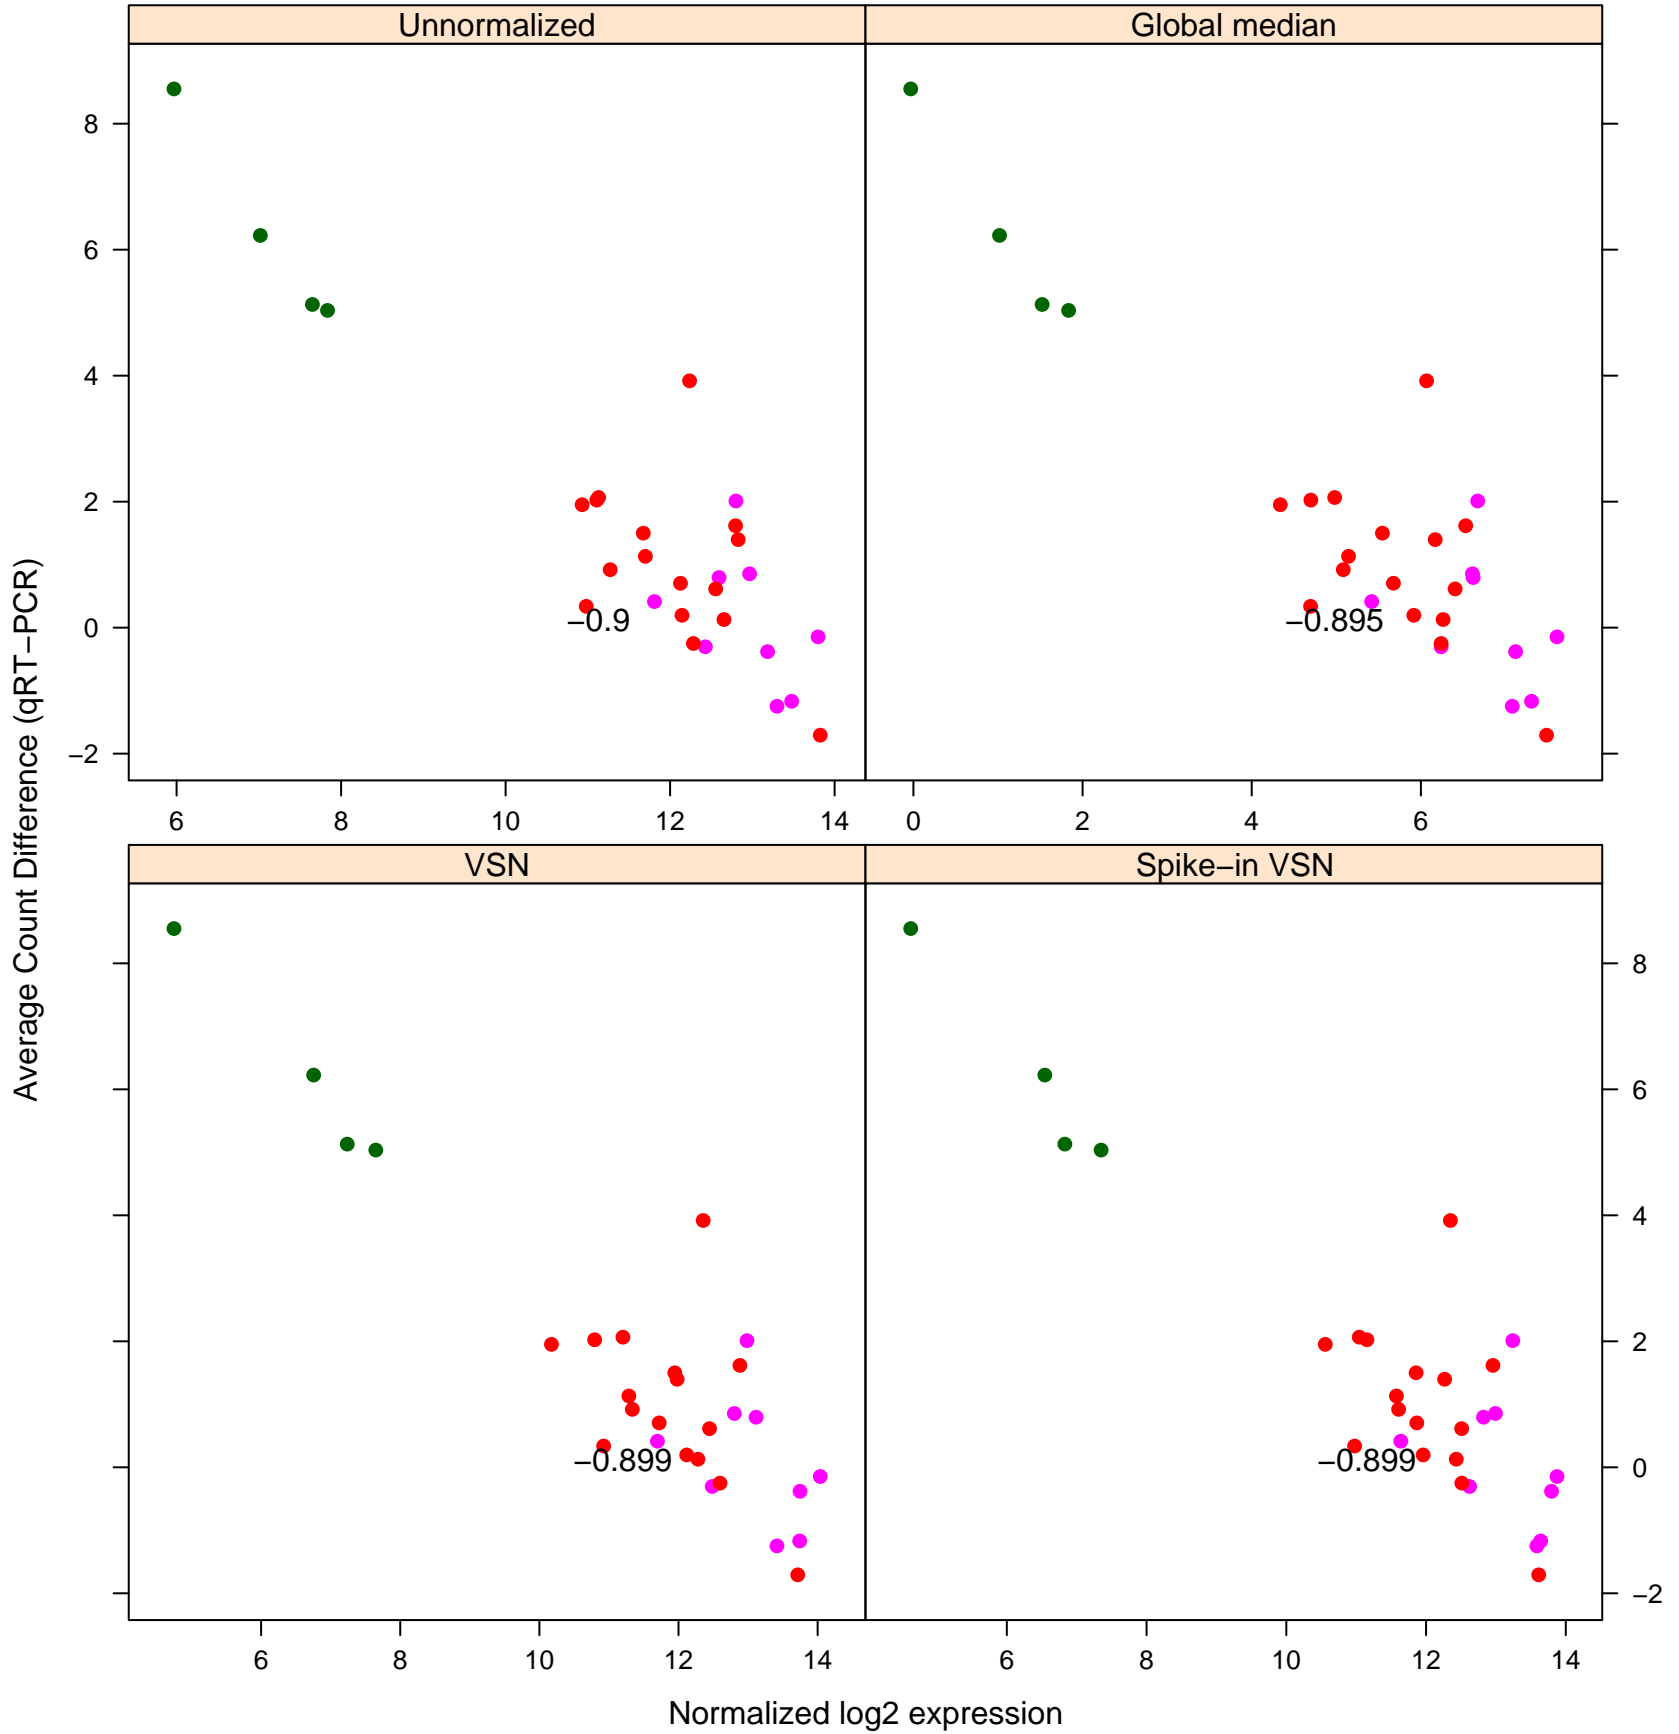

# hsa-miR-182

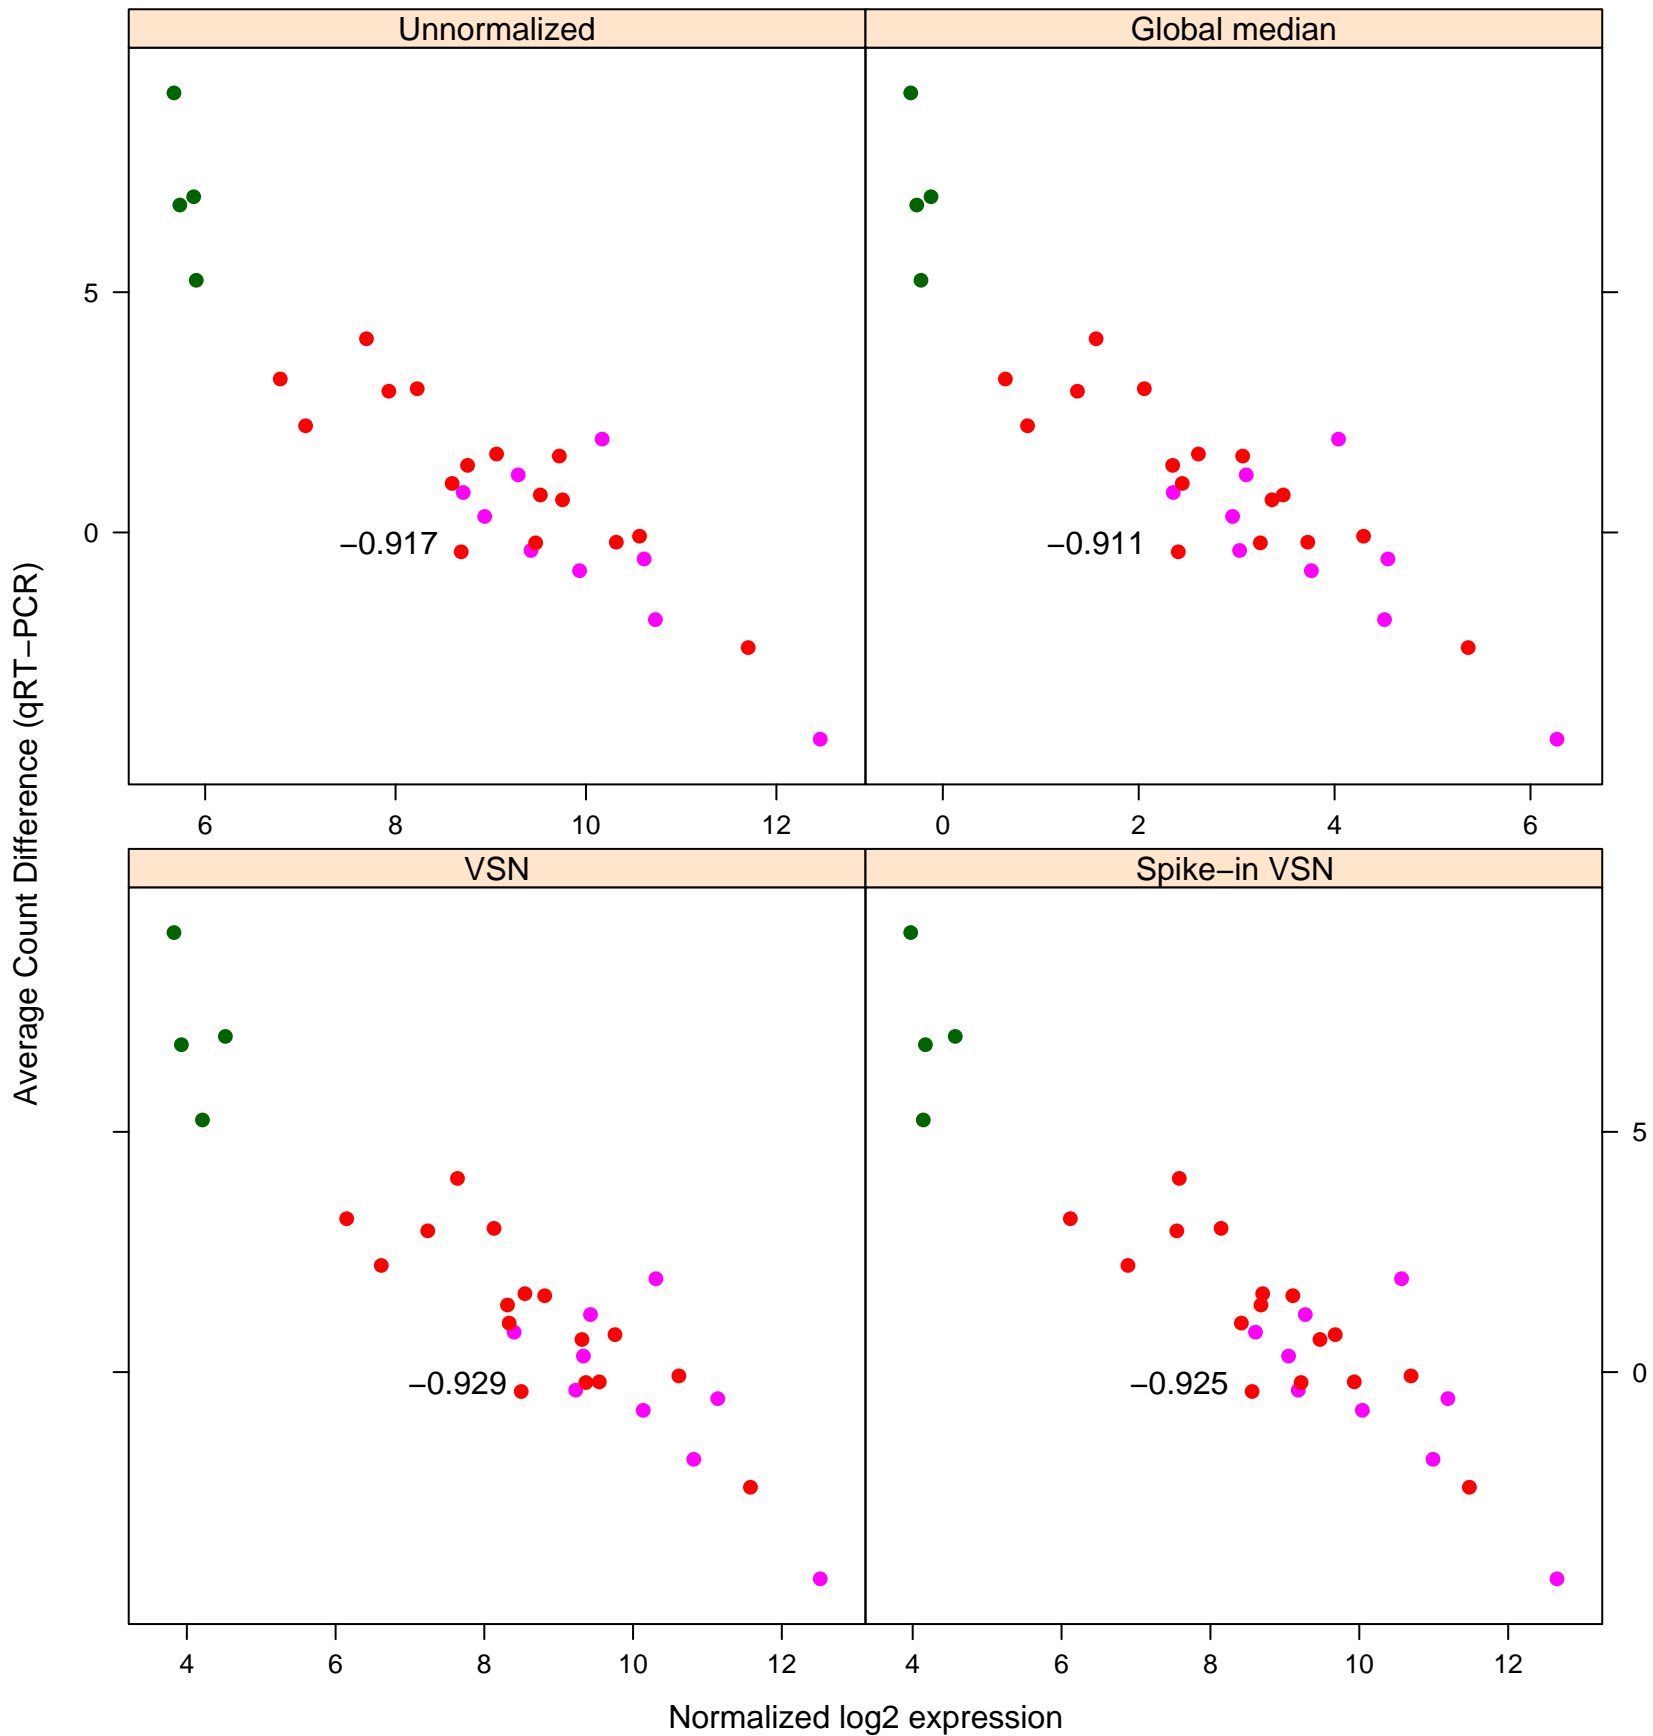

# hsa-miR-96

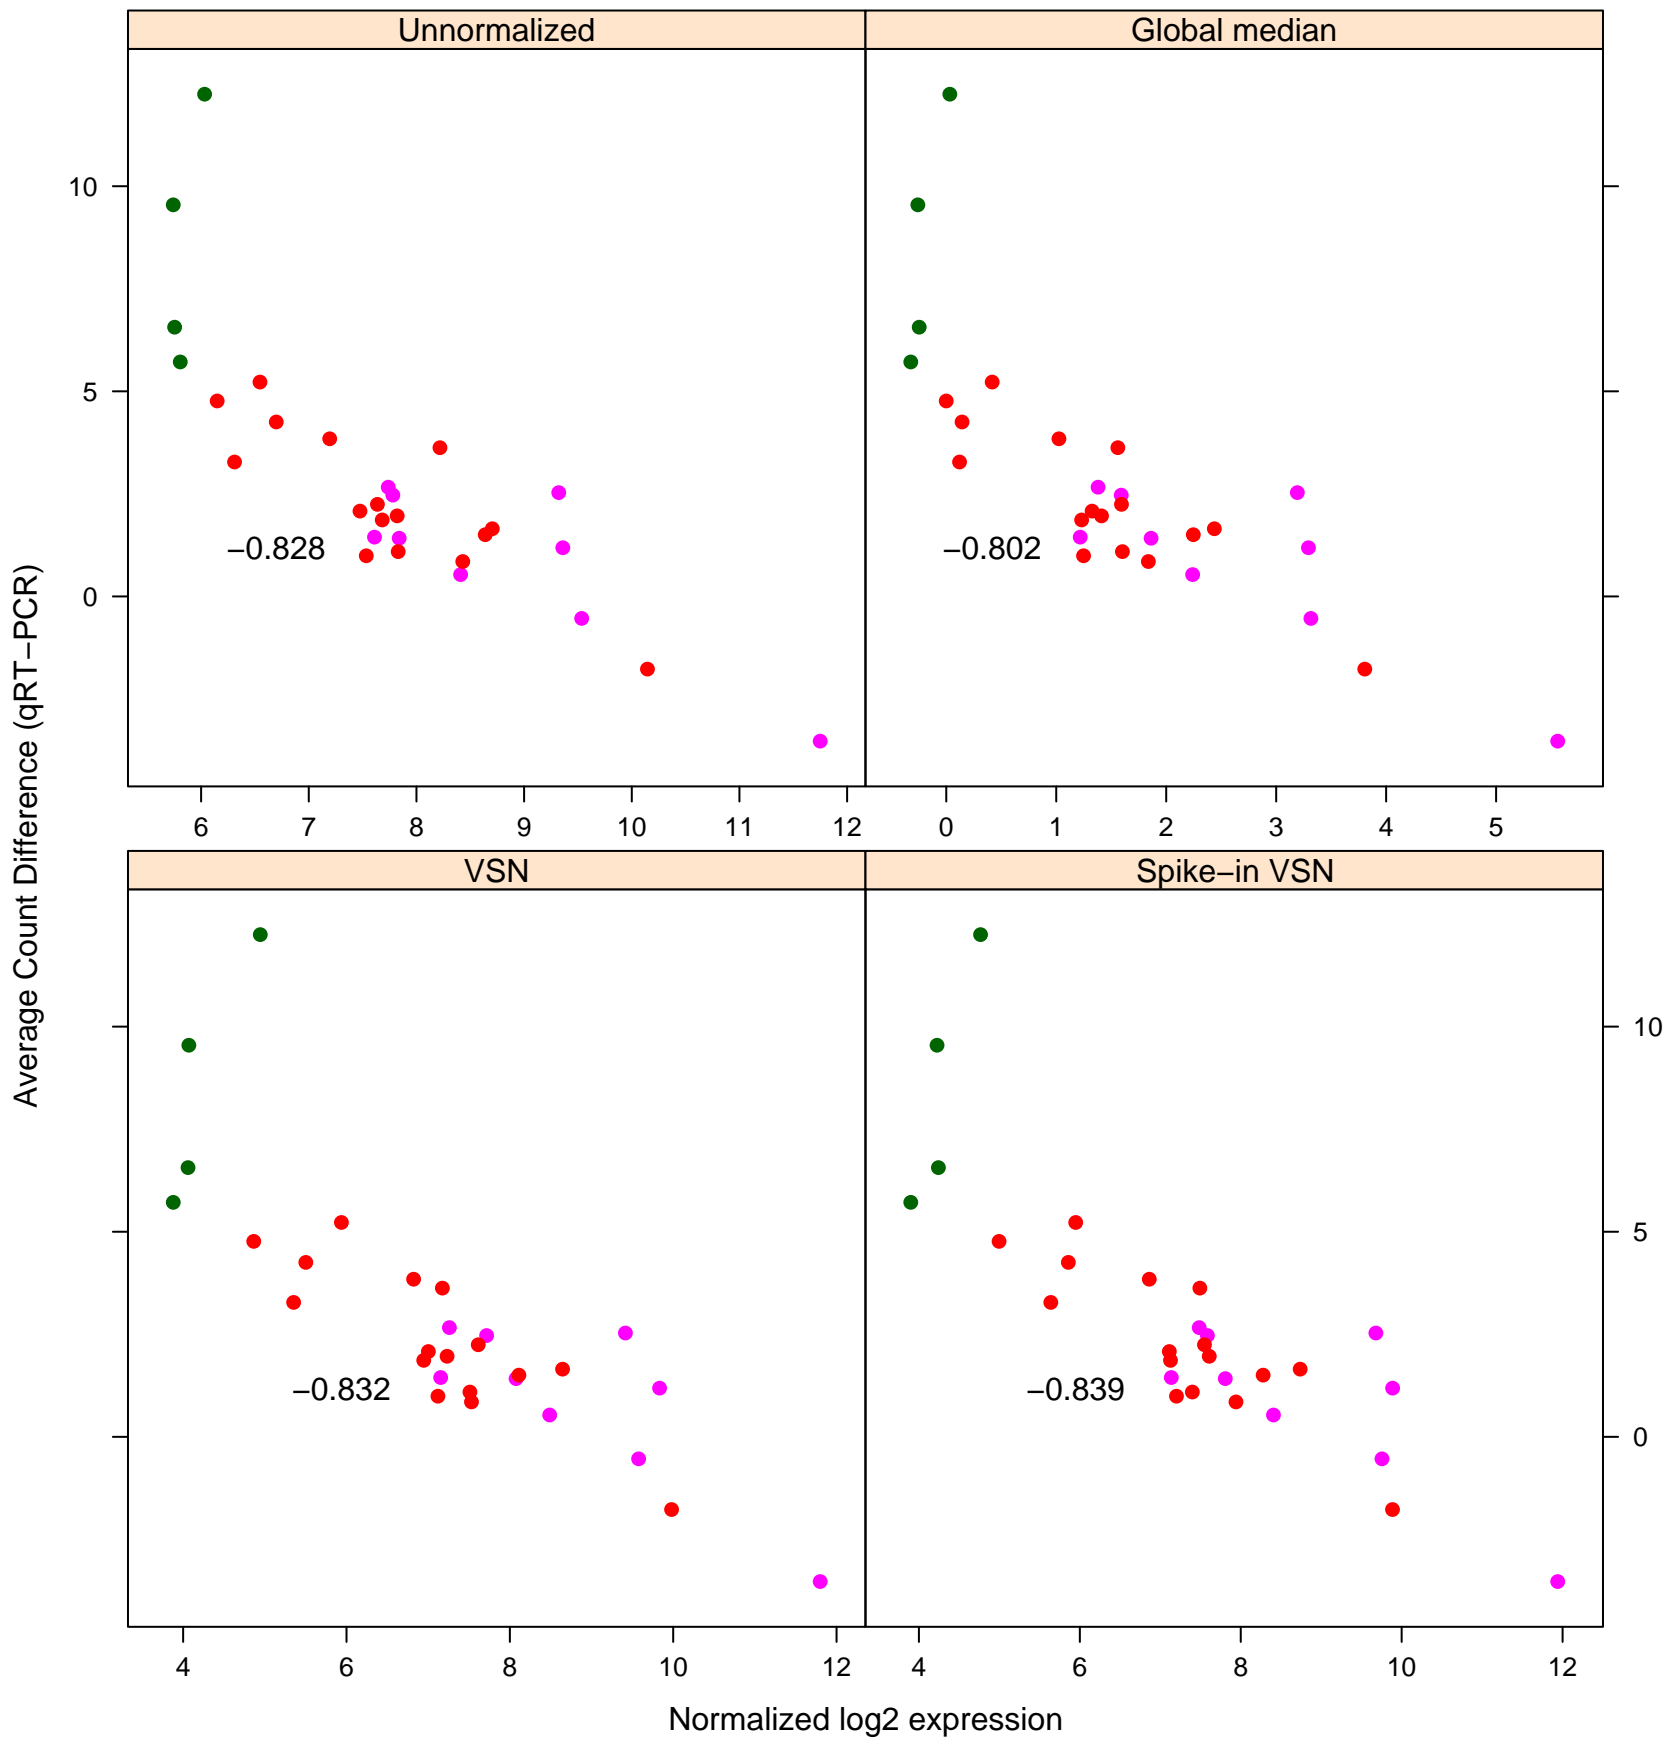

# hsa-miR-100

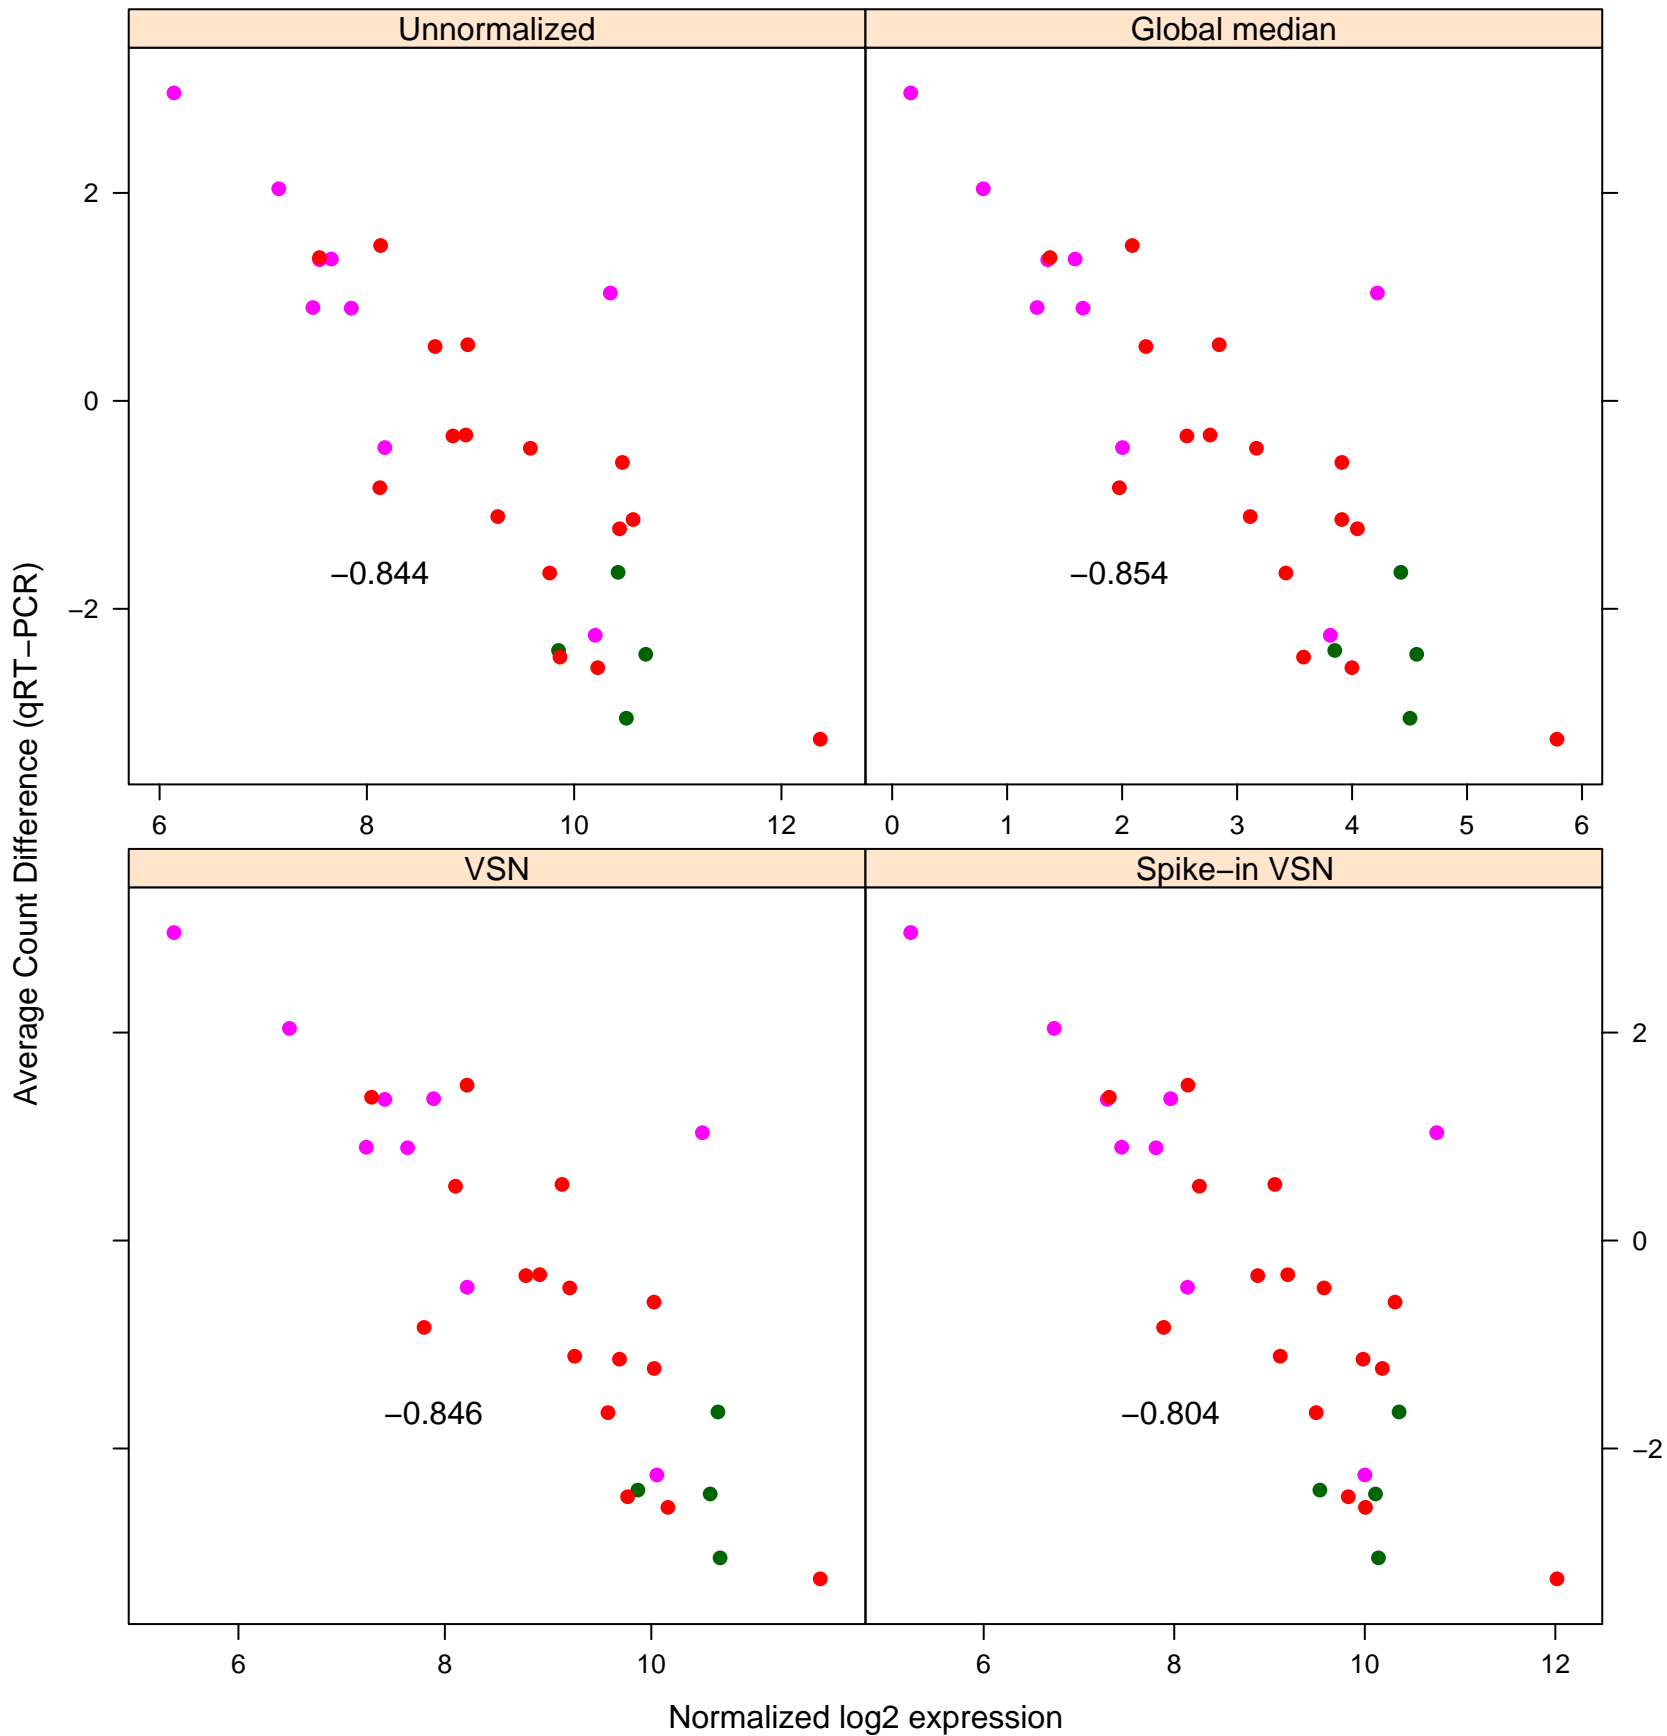

# hsa-miR-155

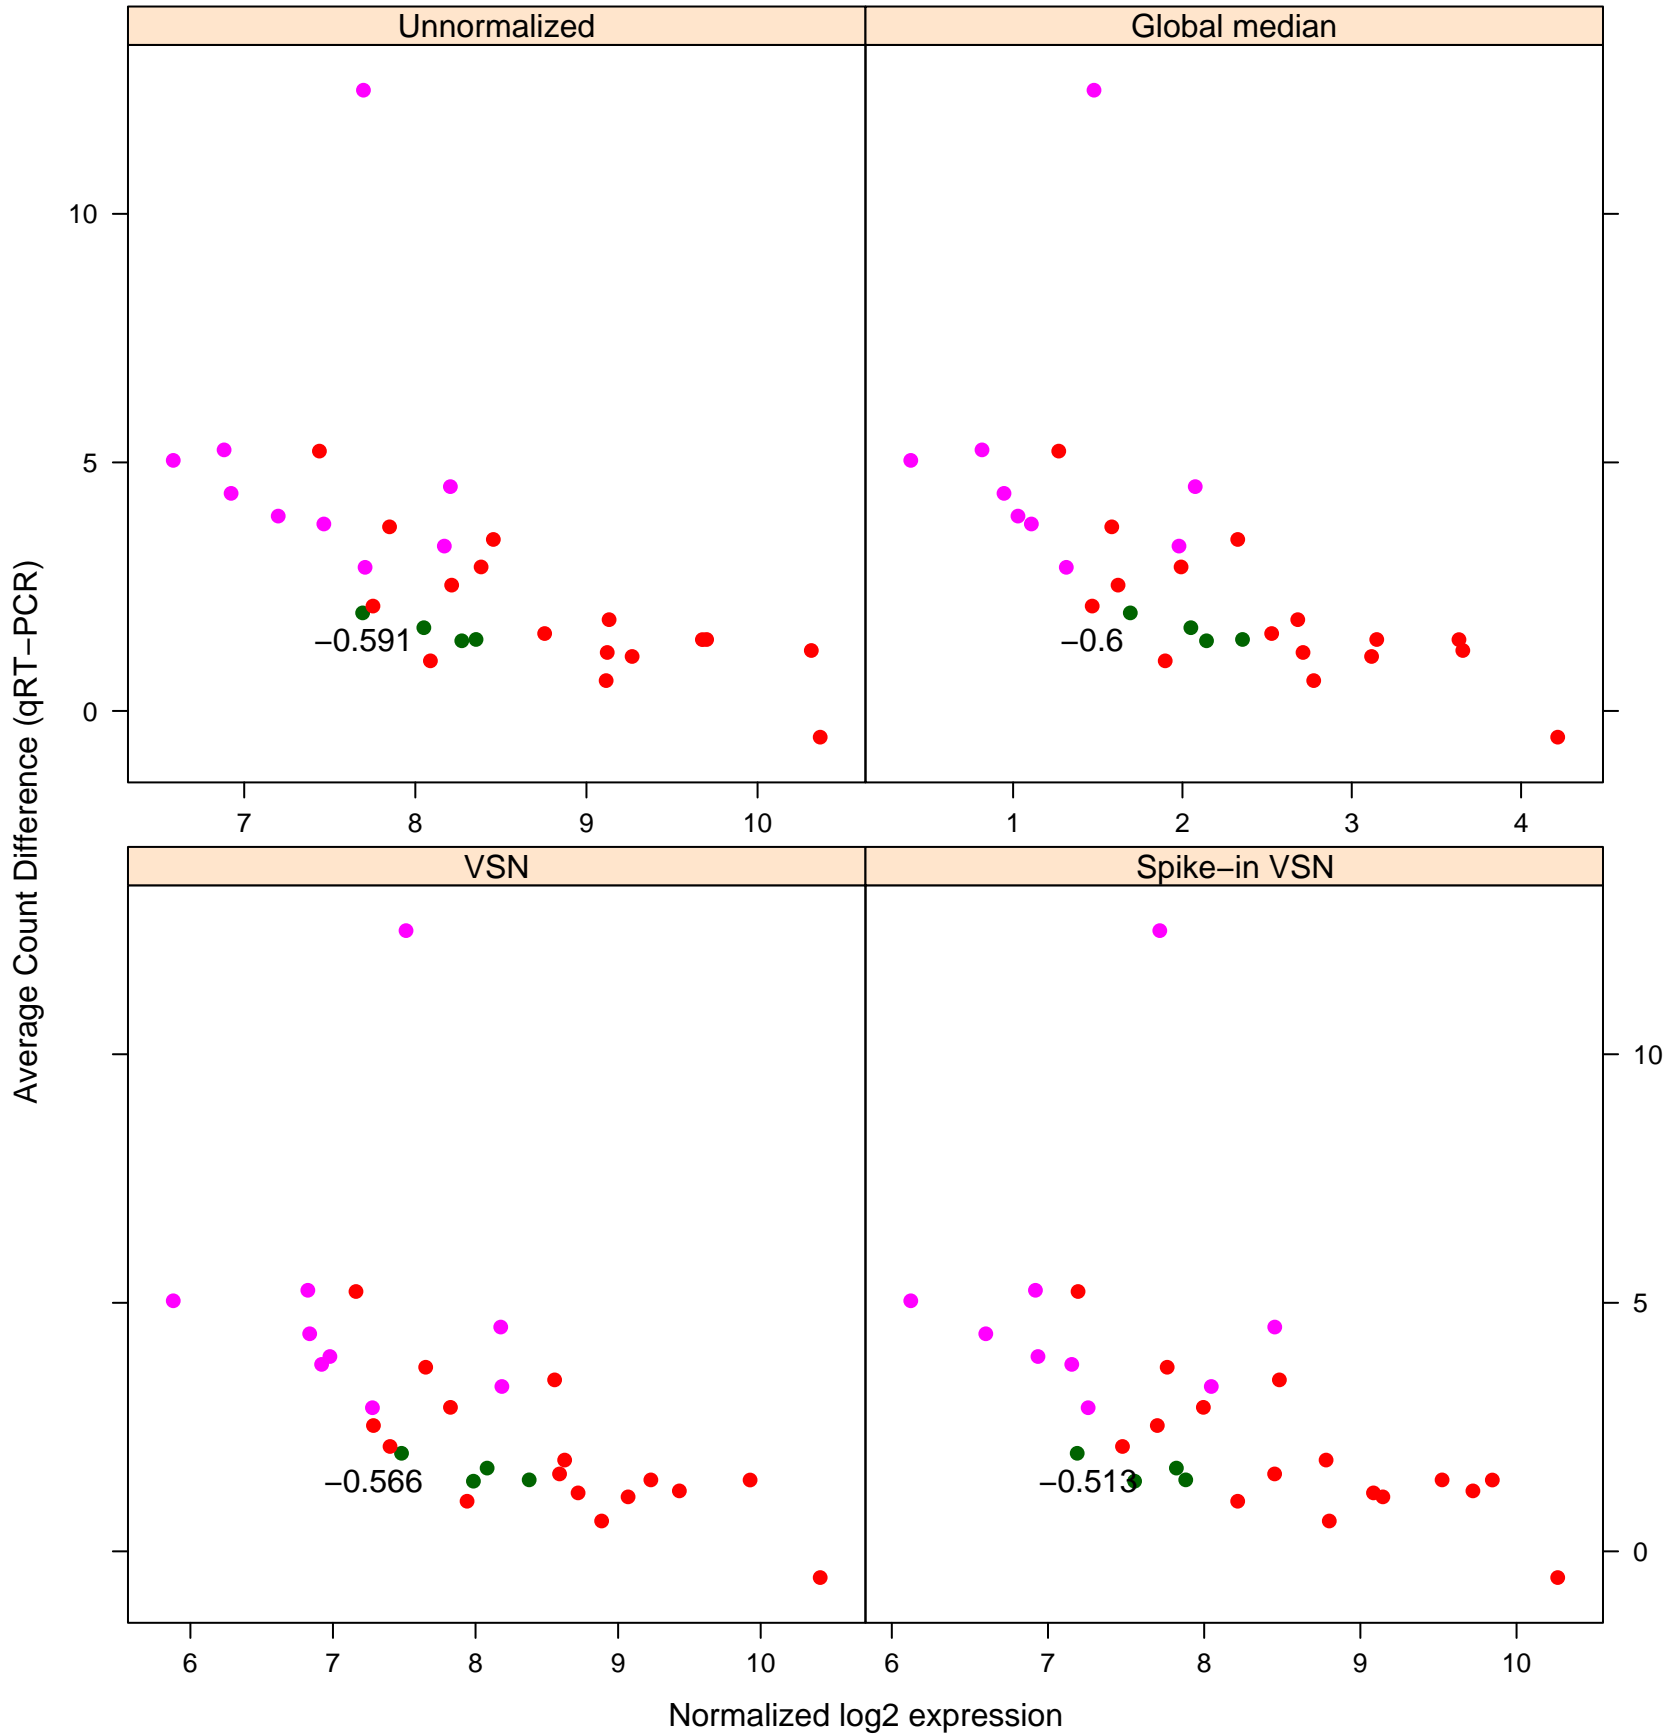

# hsa-miR-422b

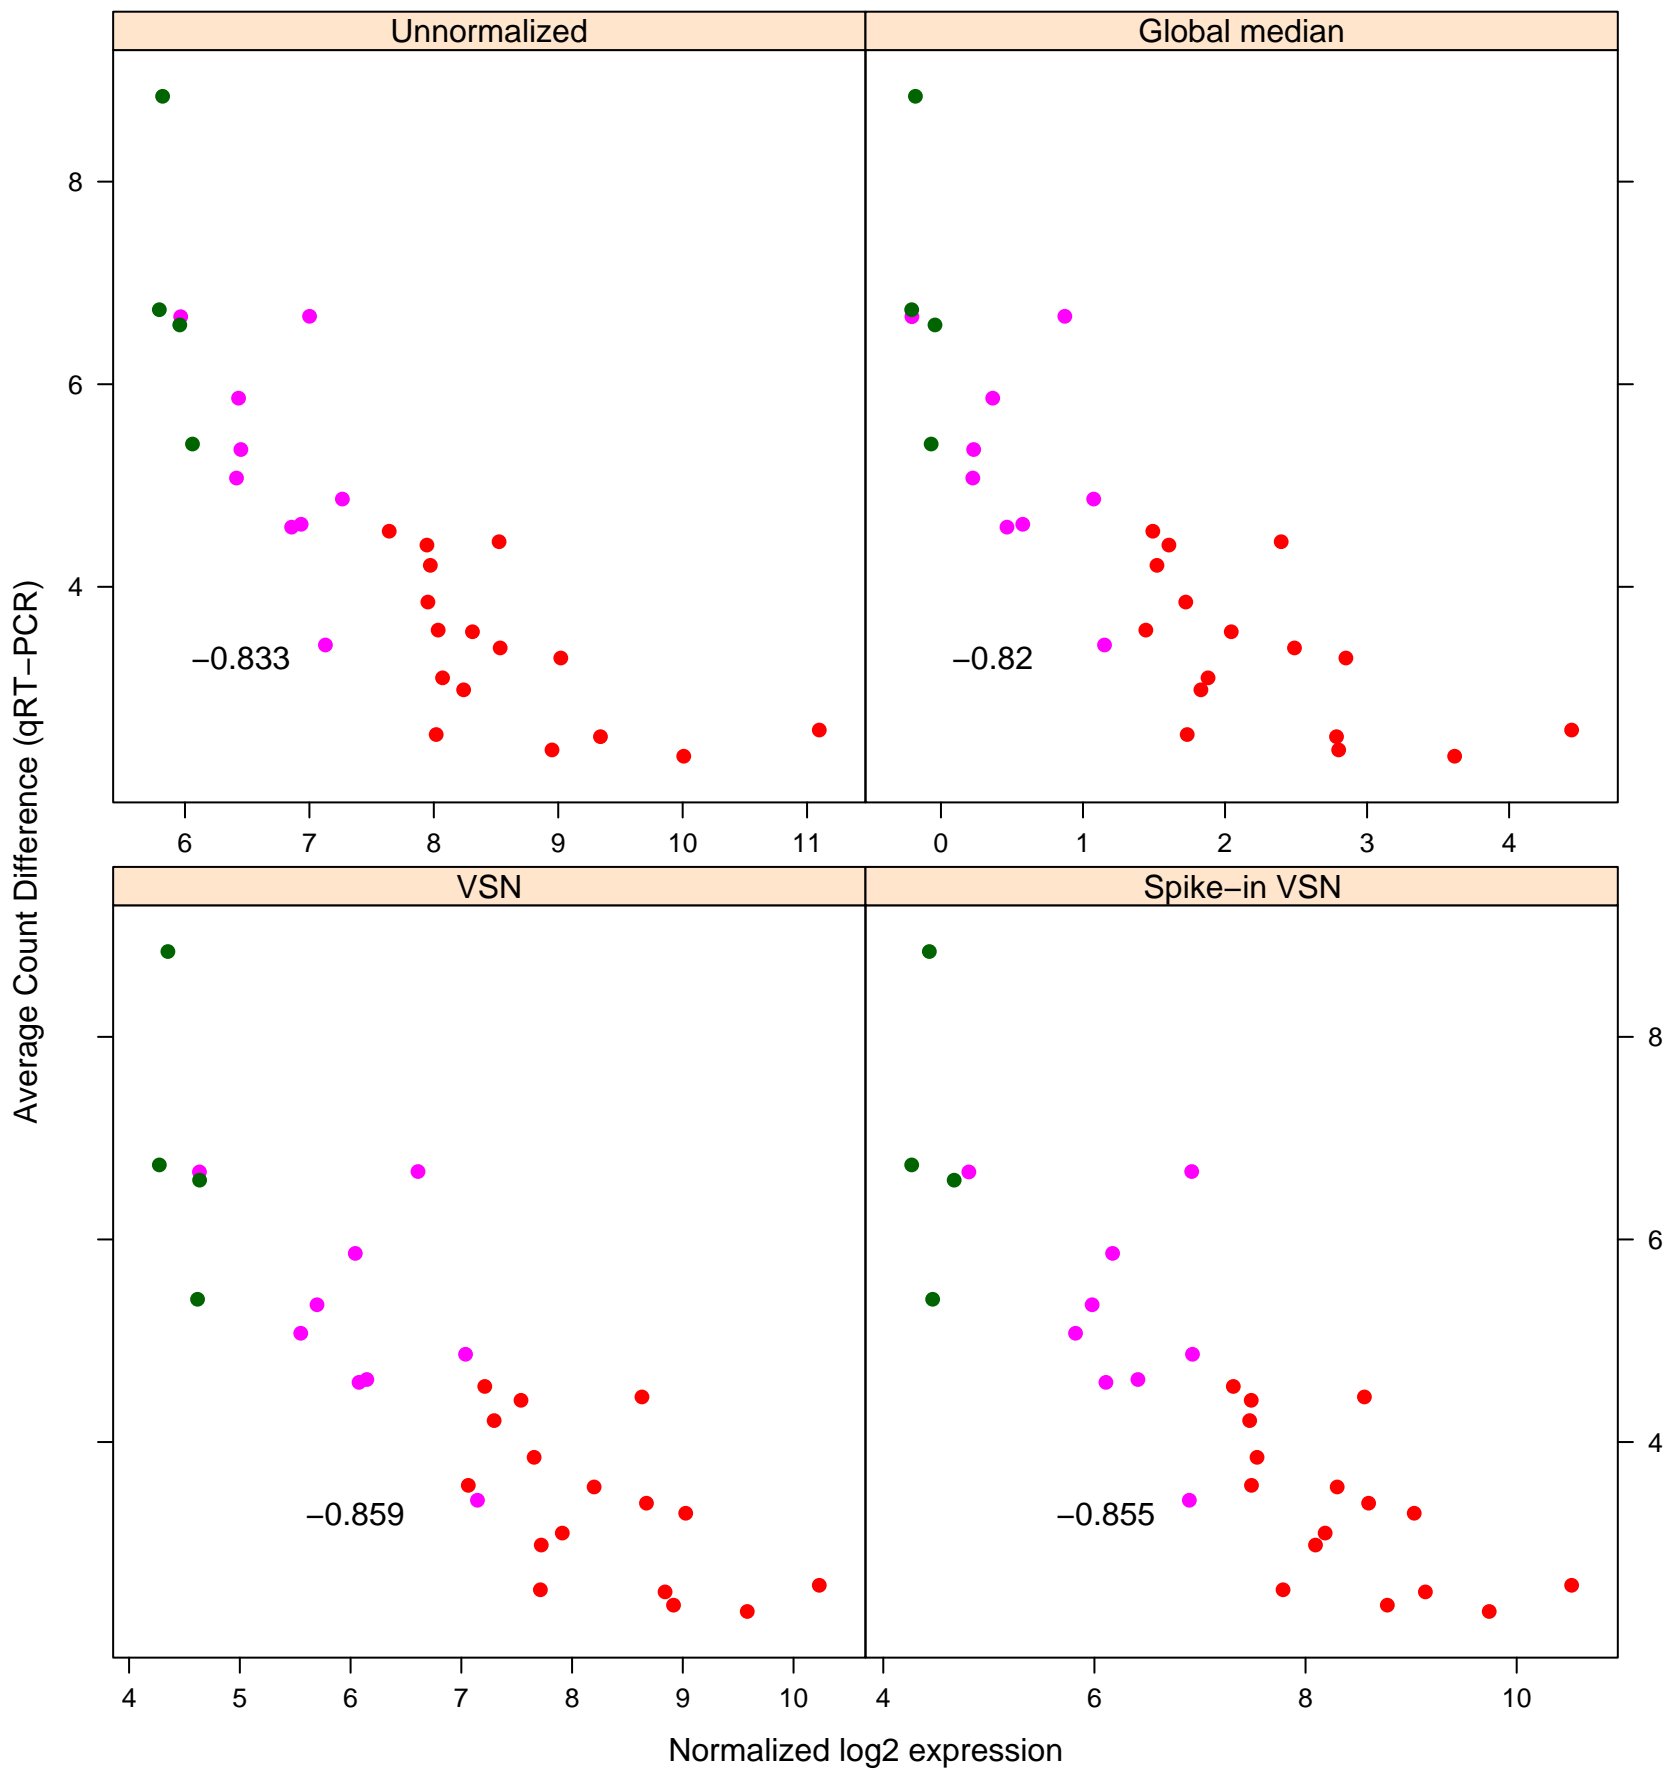



# hsa-miR-200b

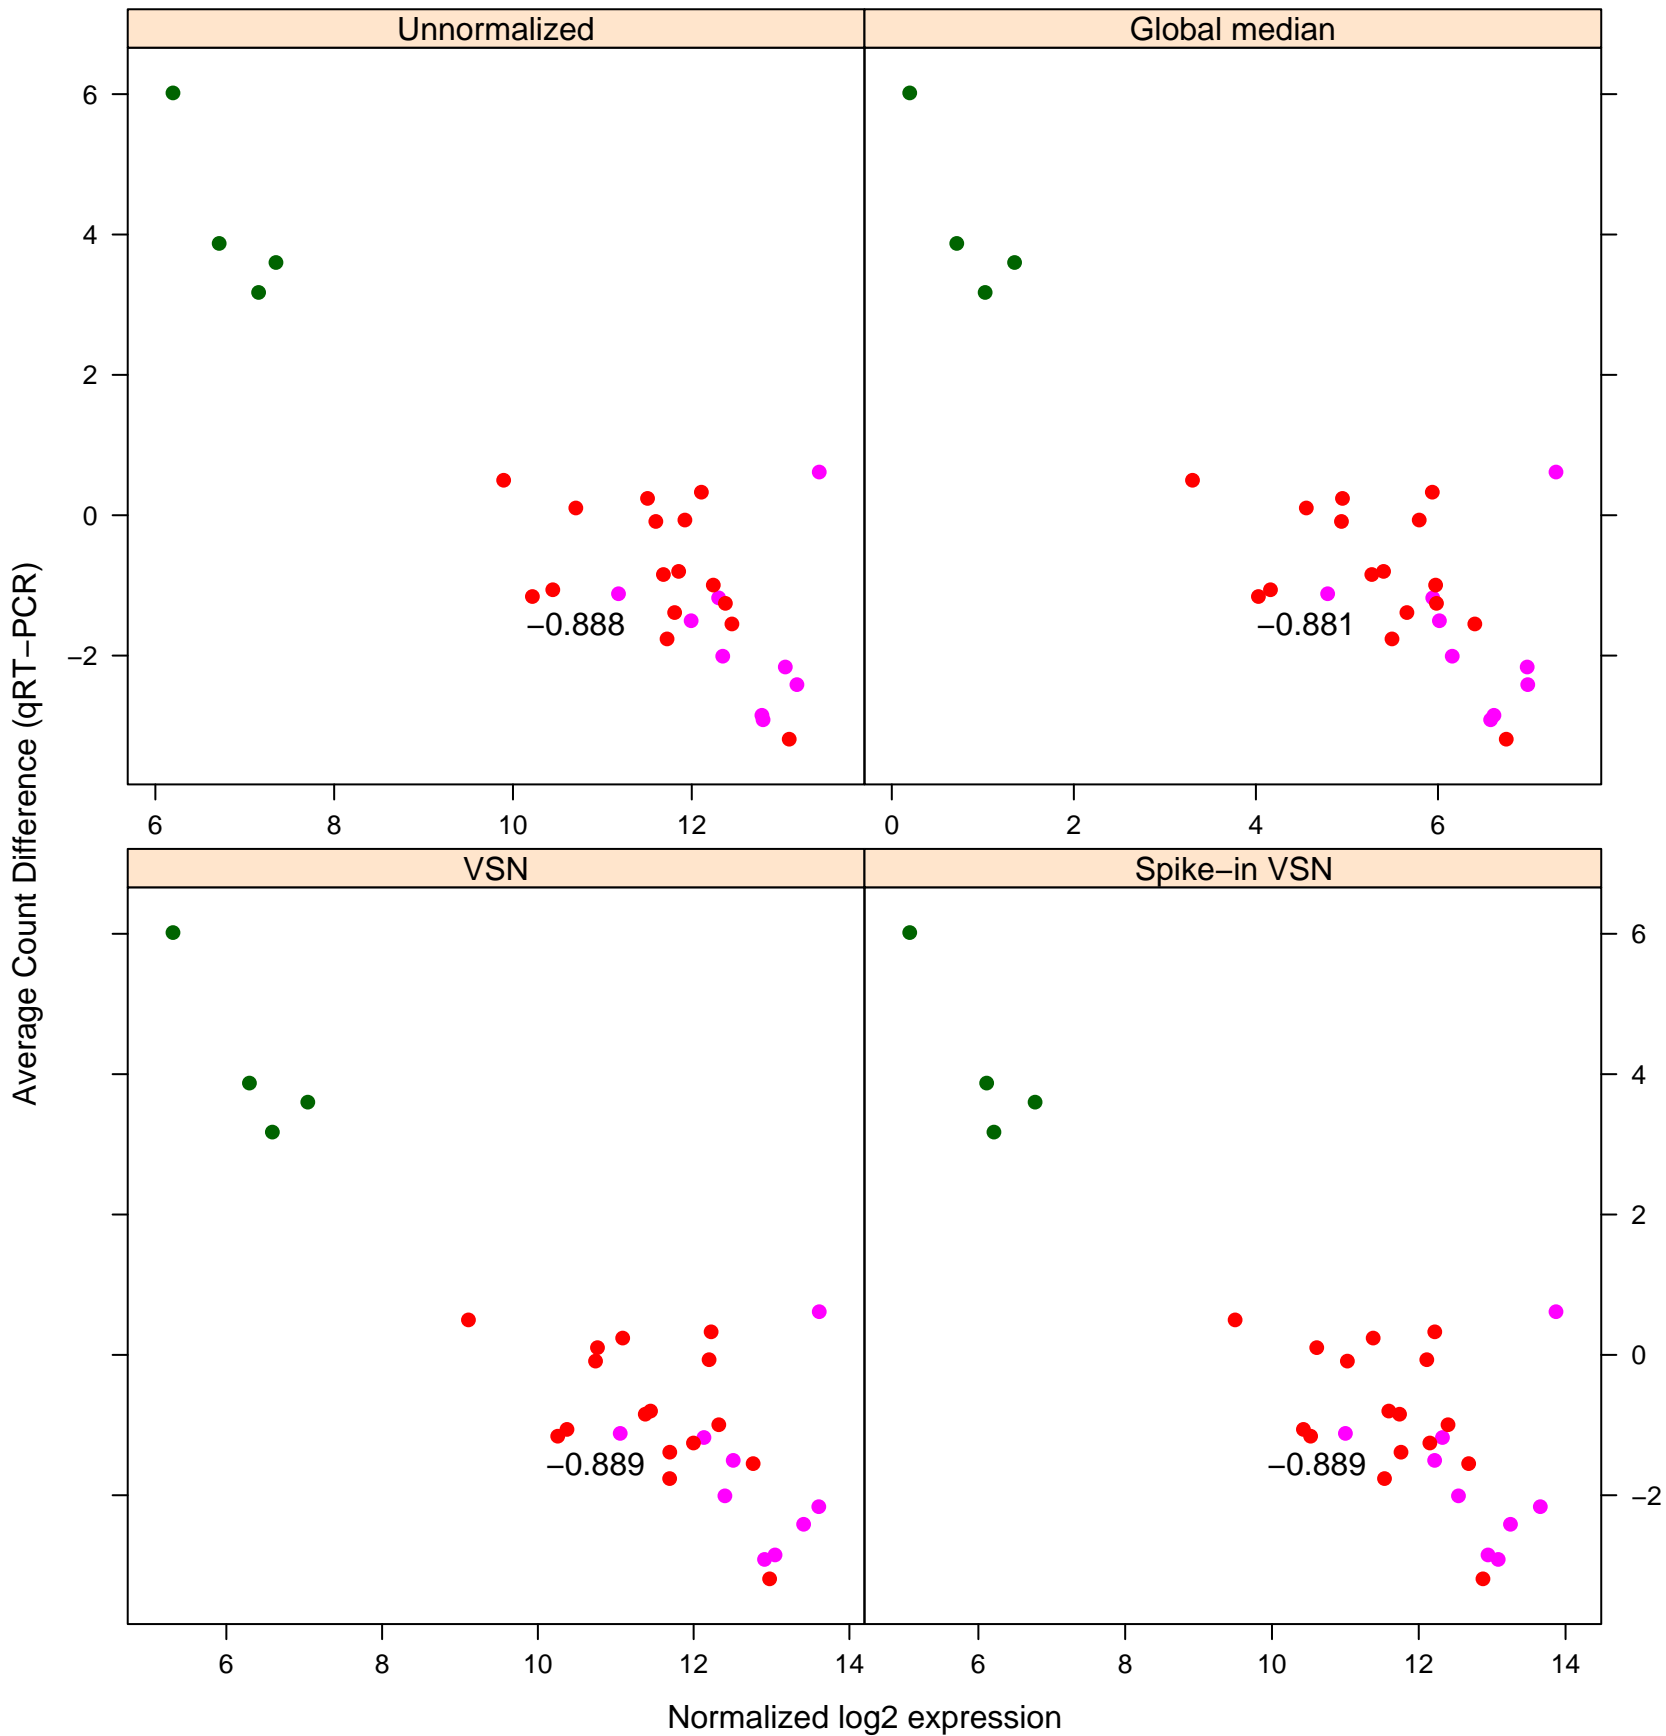

# hsa-miR-370

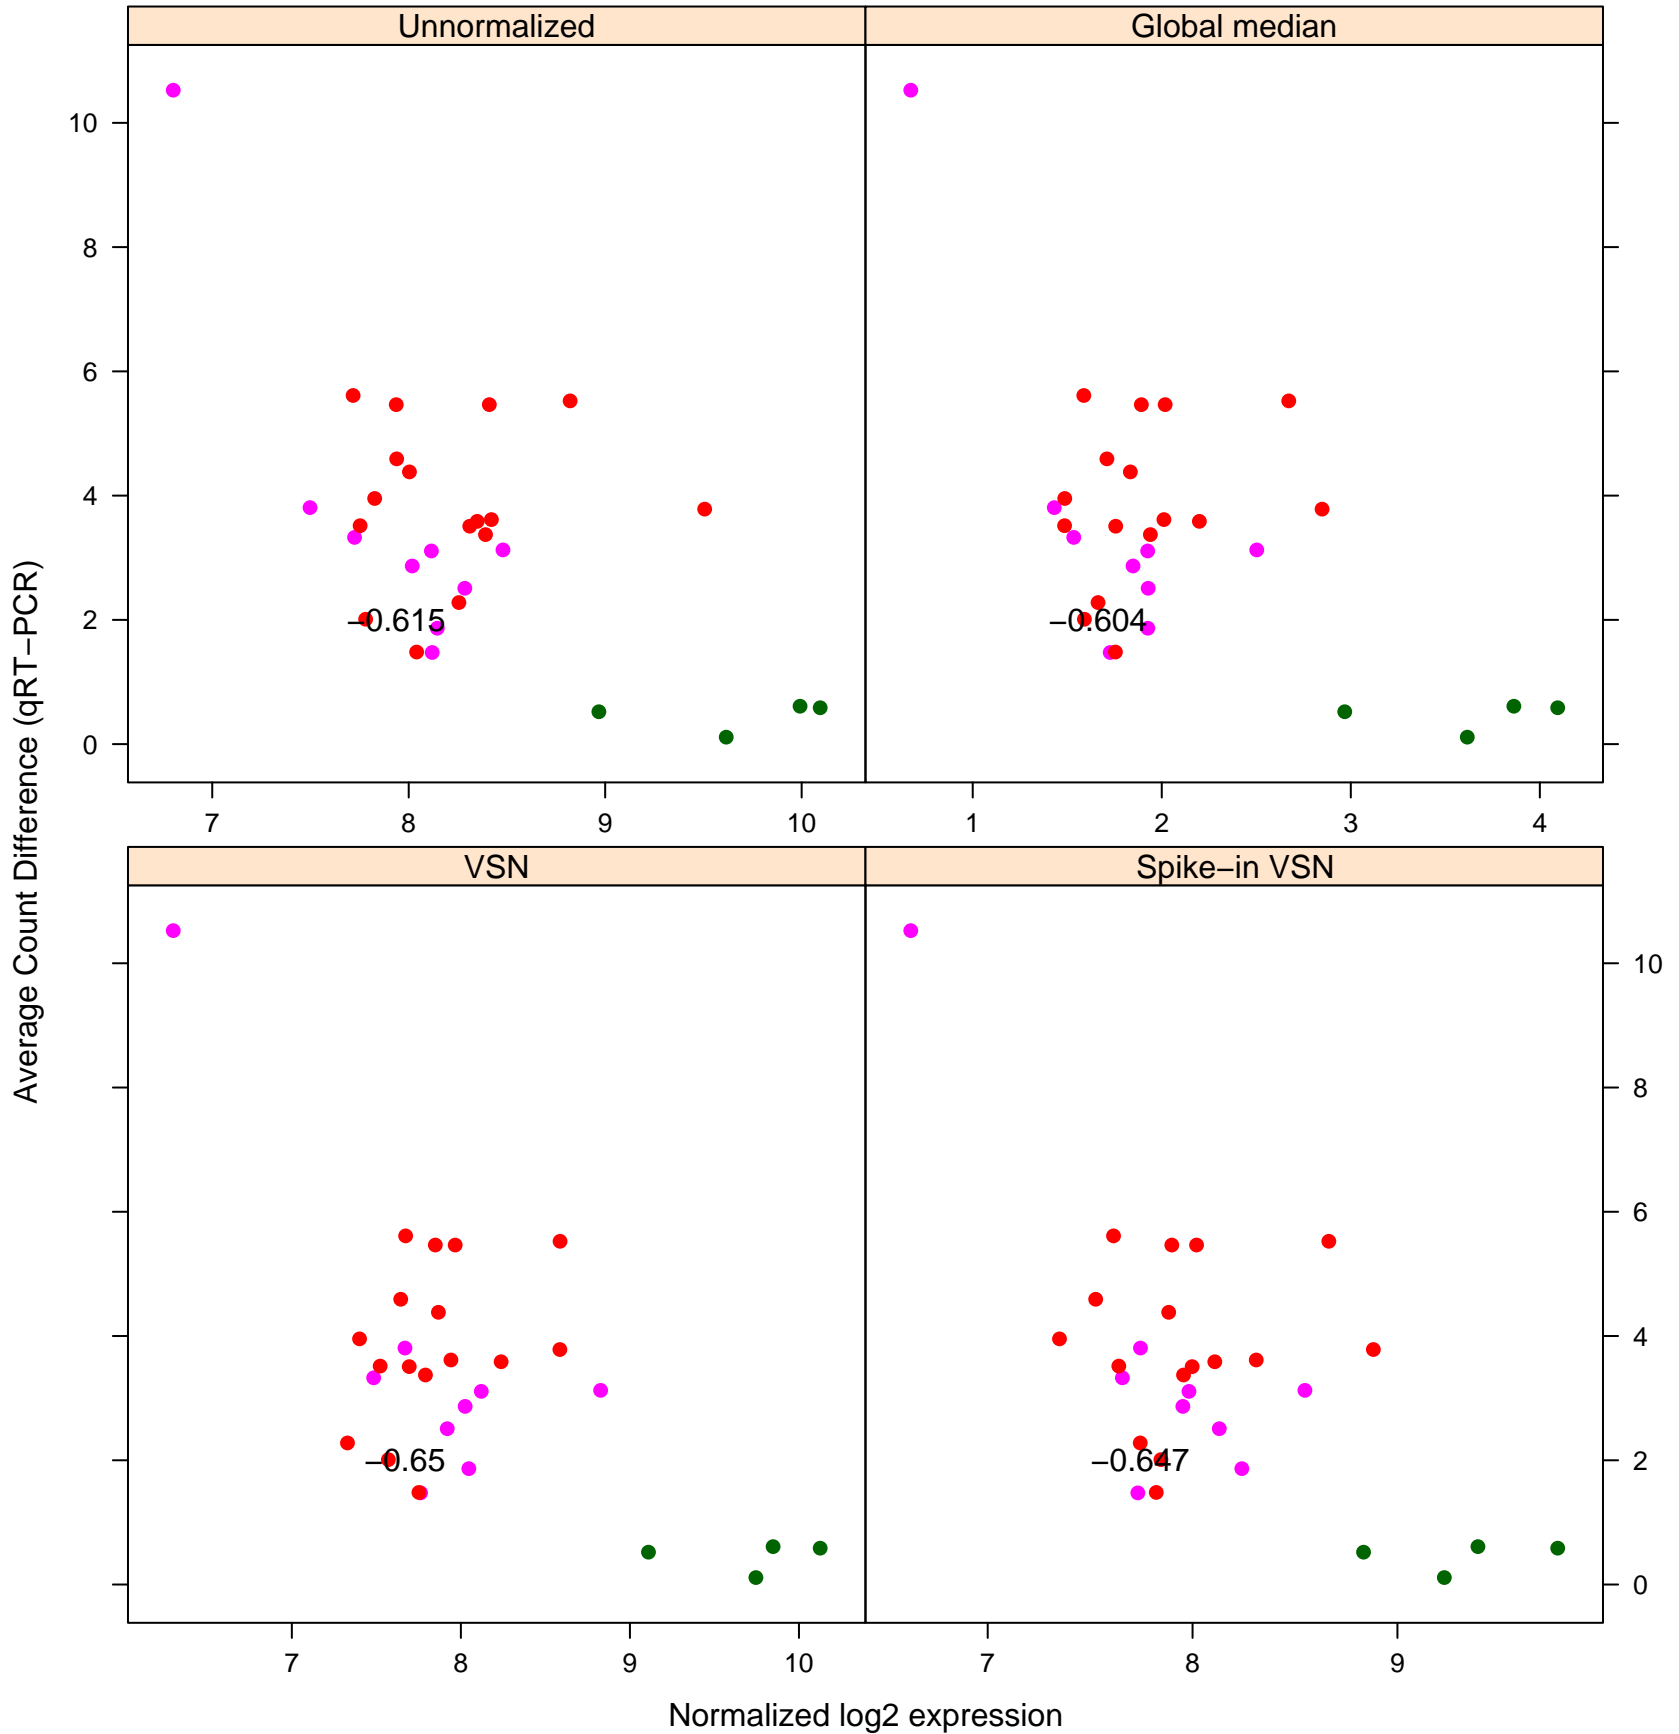

# hsa-miR-519e\*

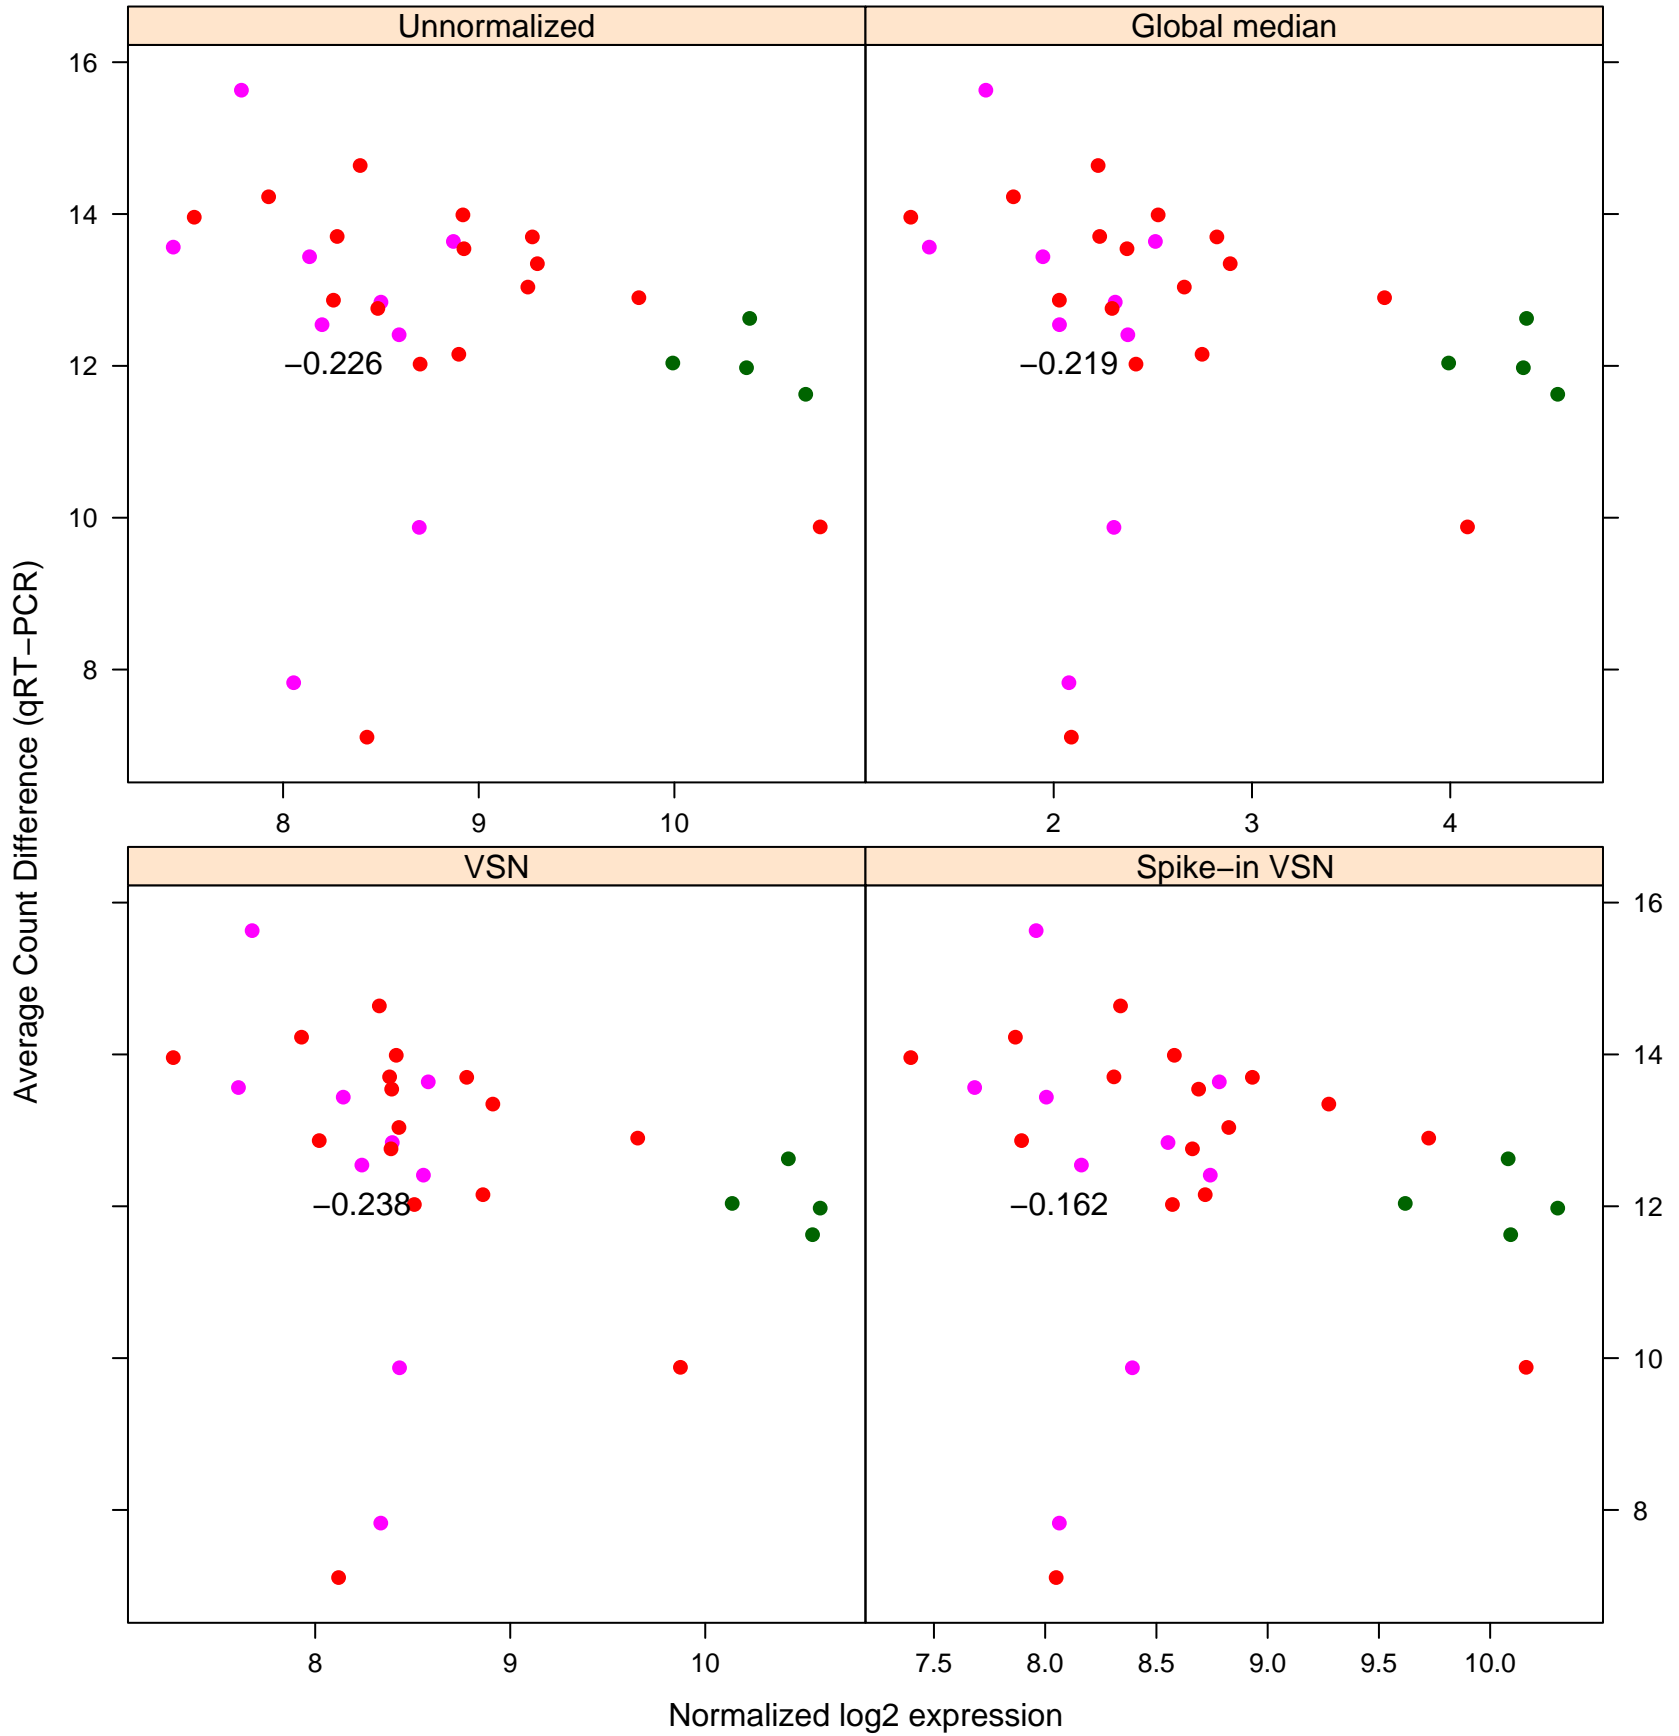

# hsa-miR-10a

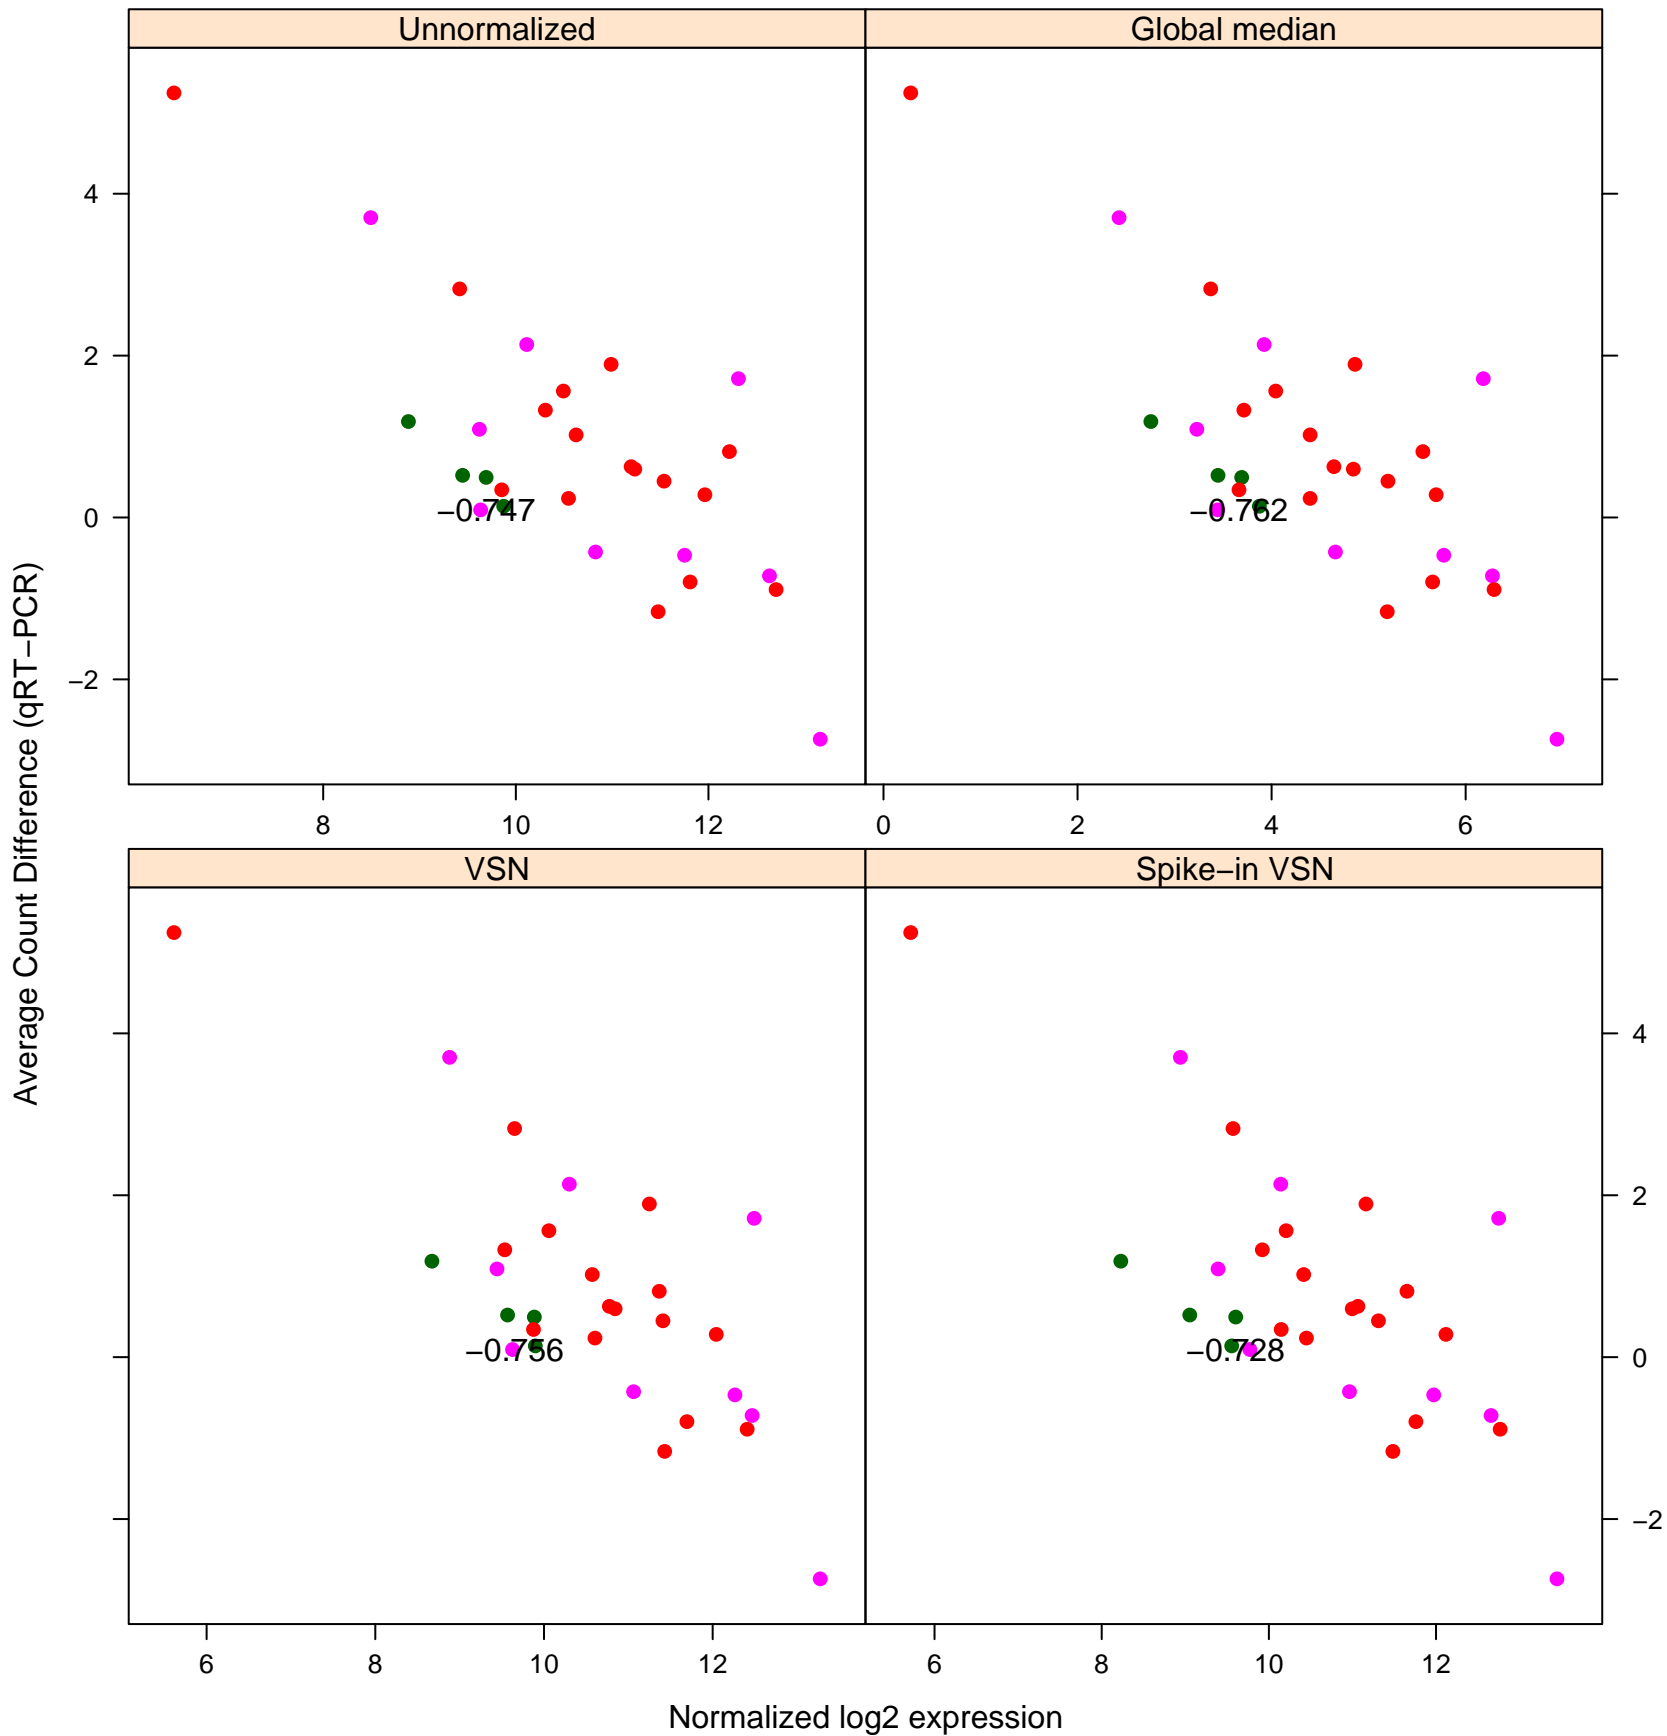

# hsa-miR-10b

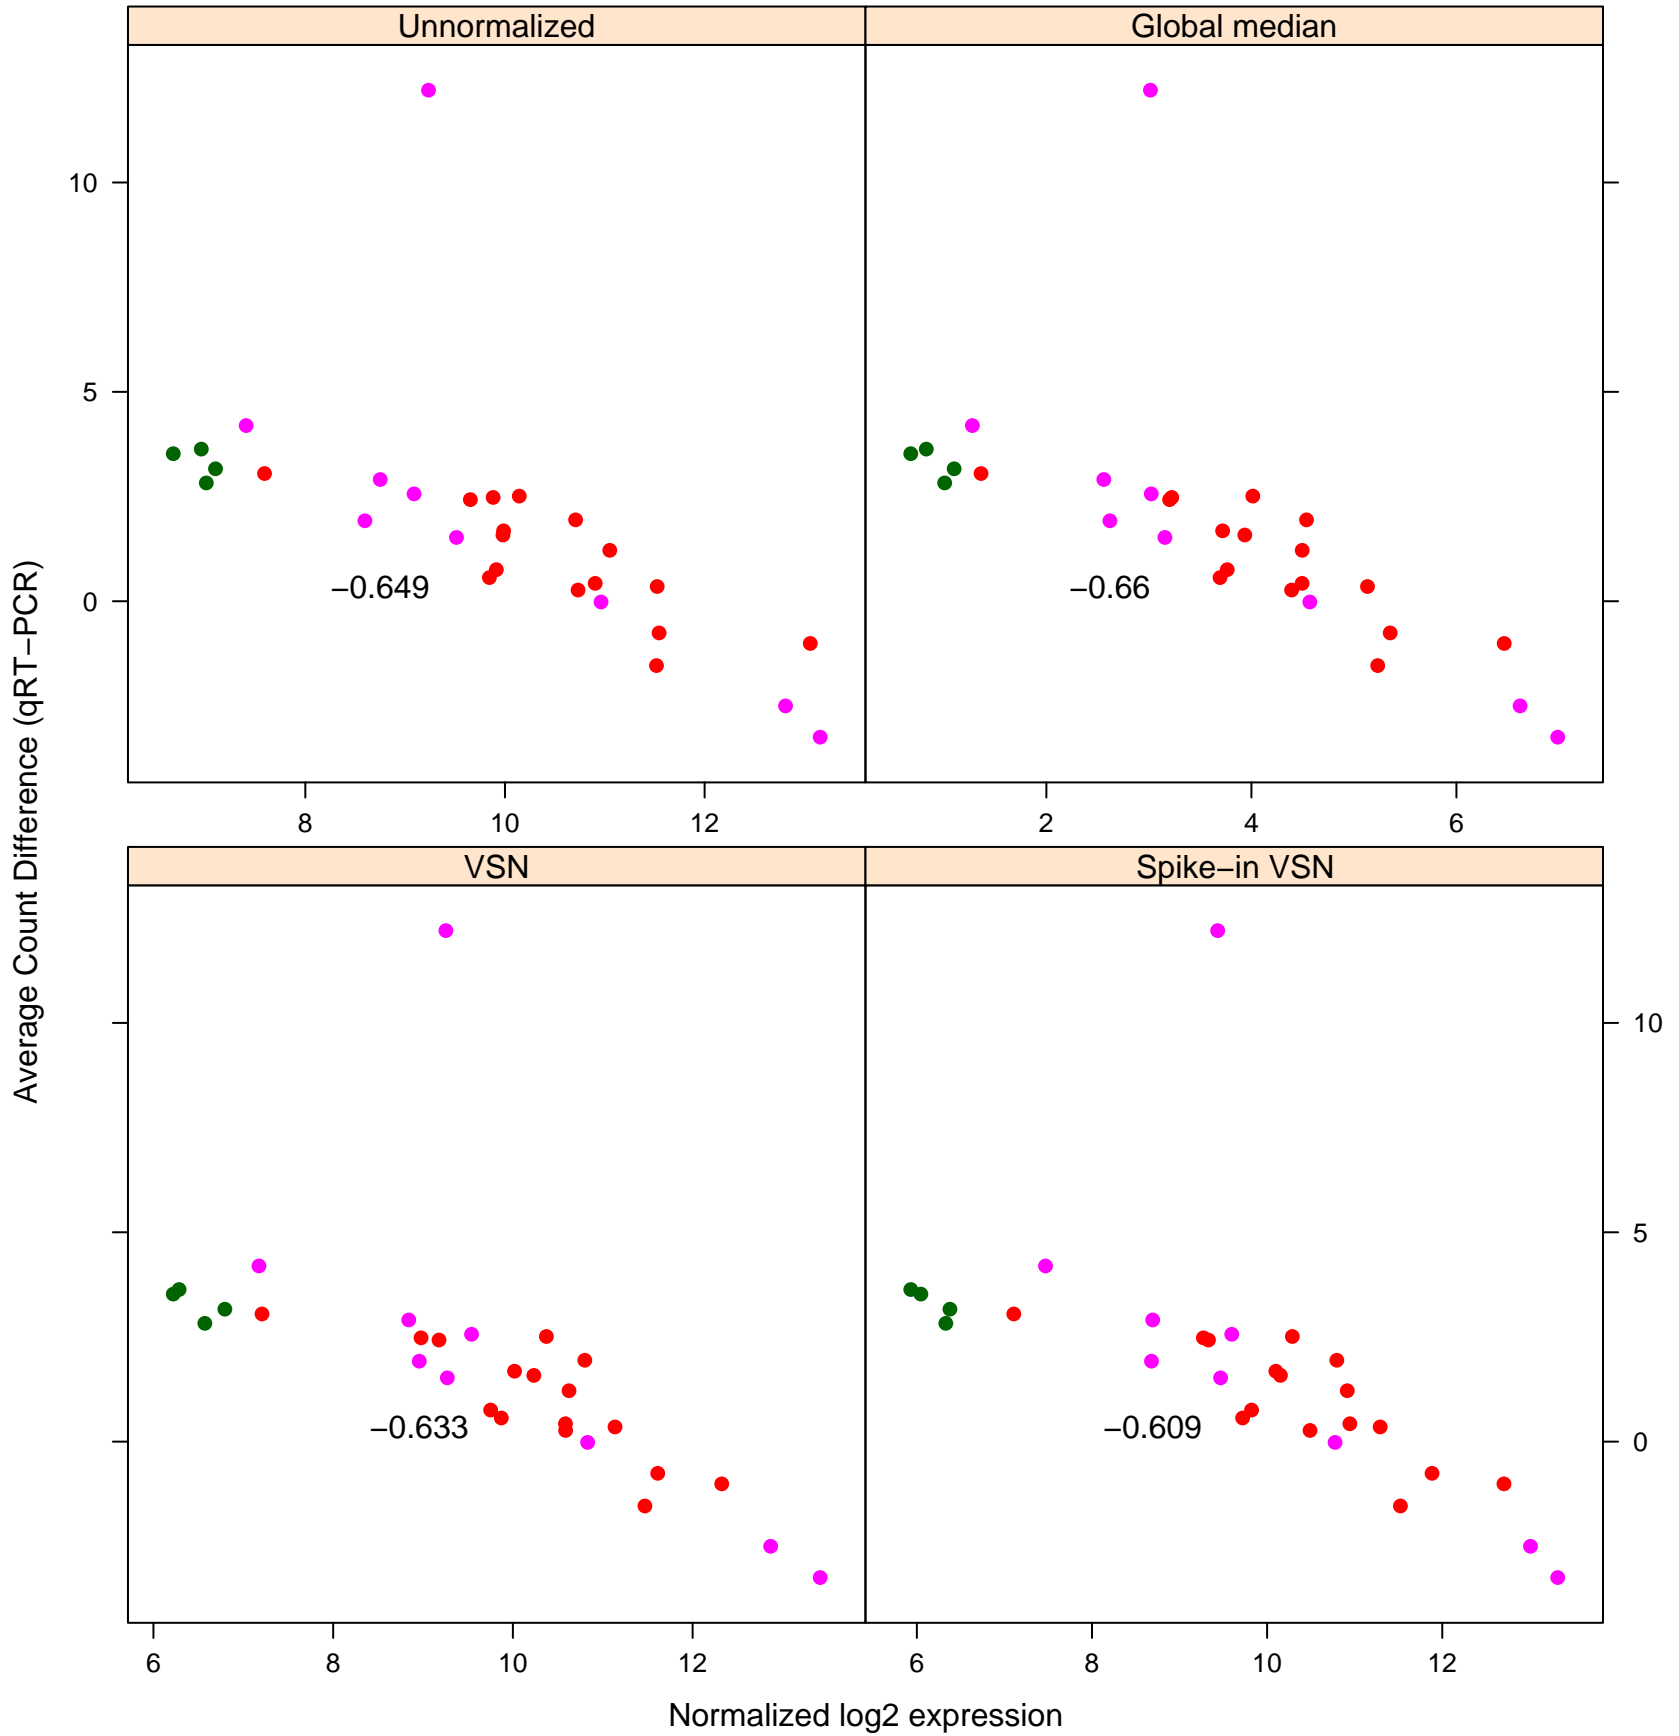

# hsa-miR-449

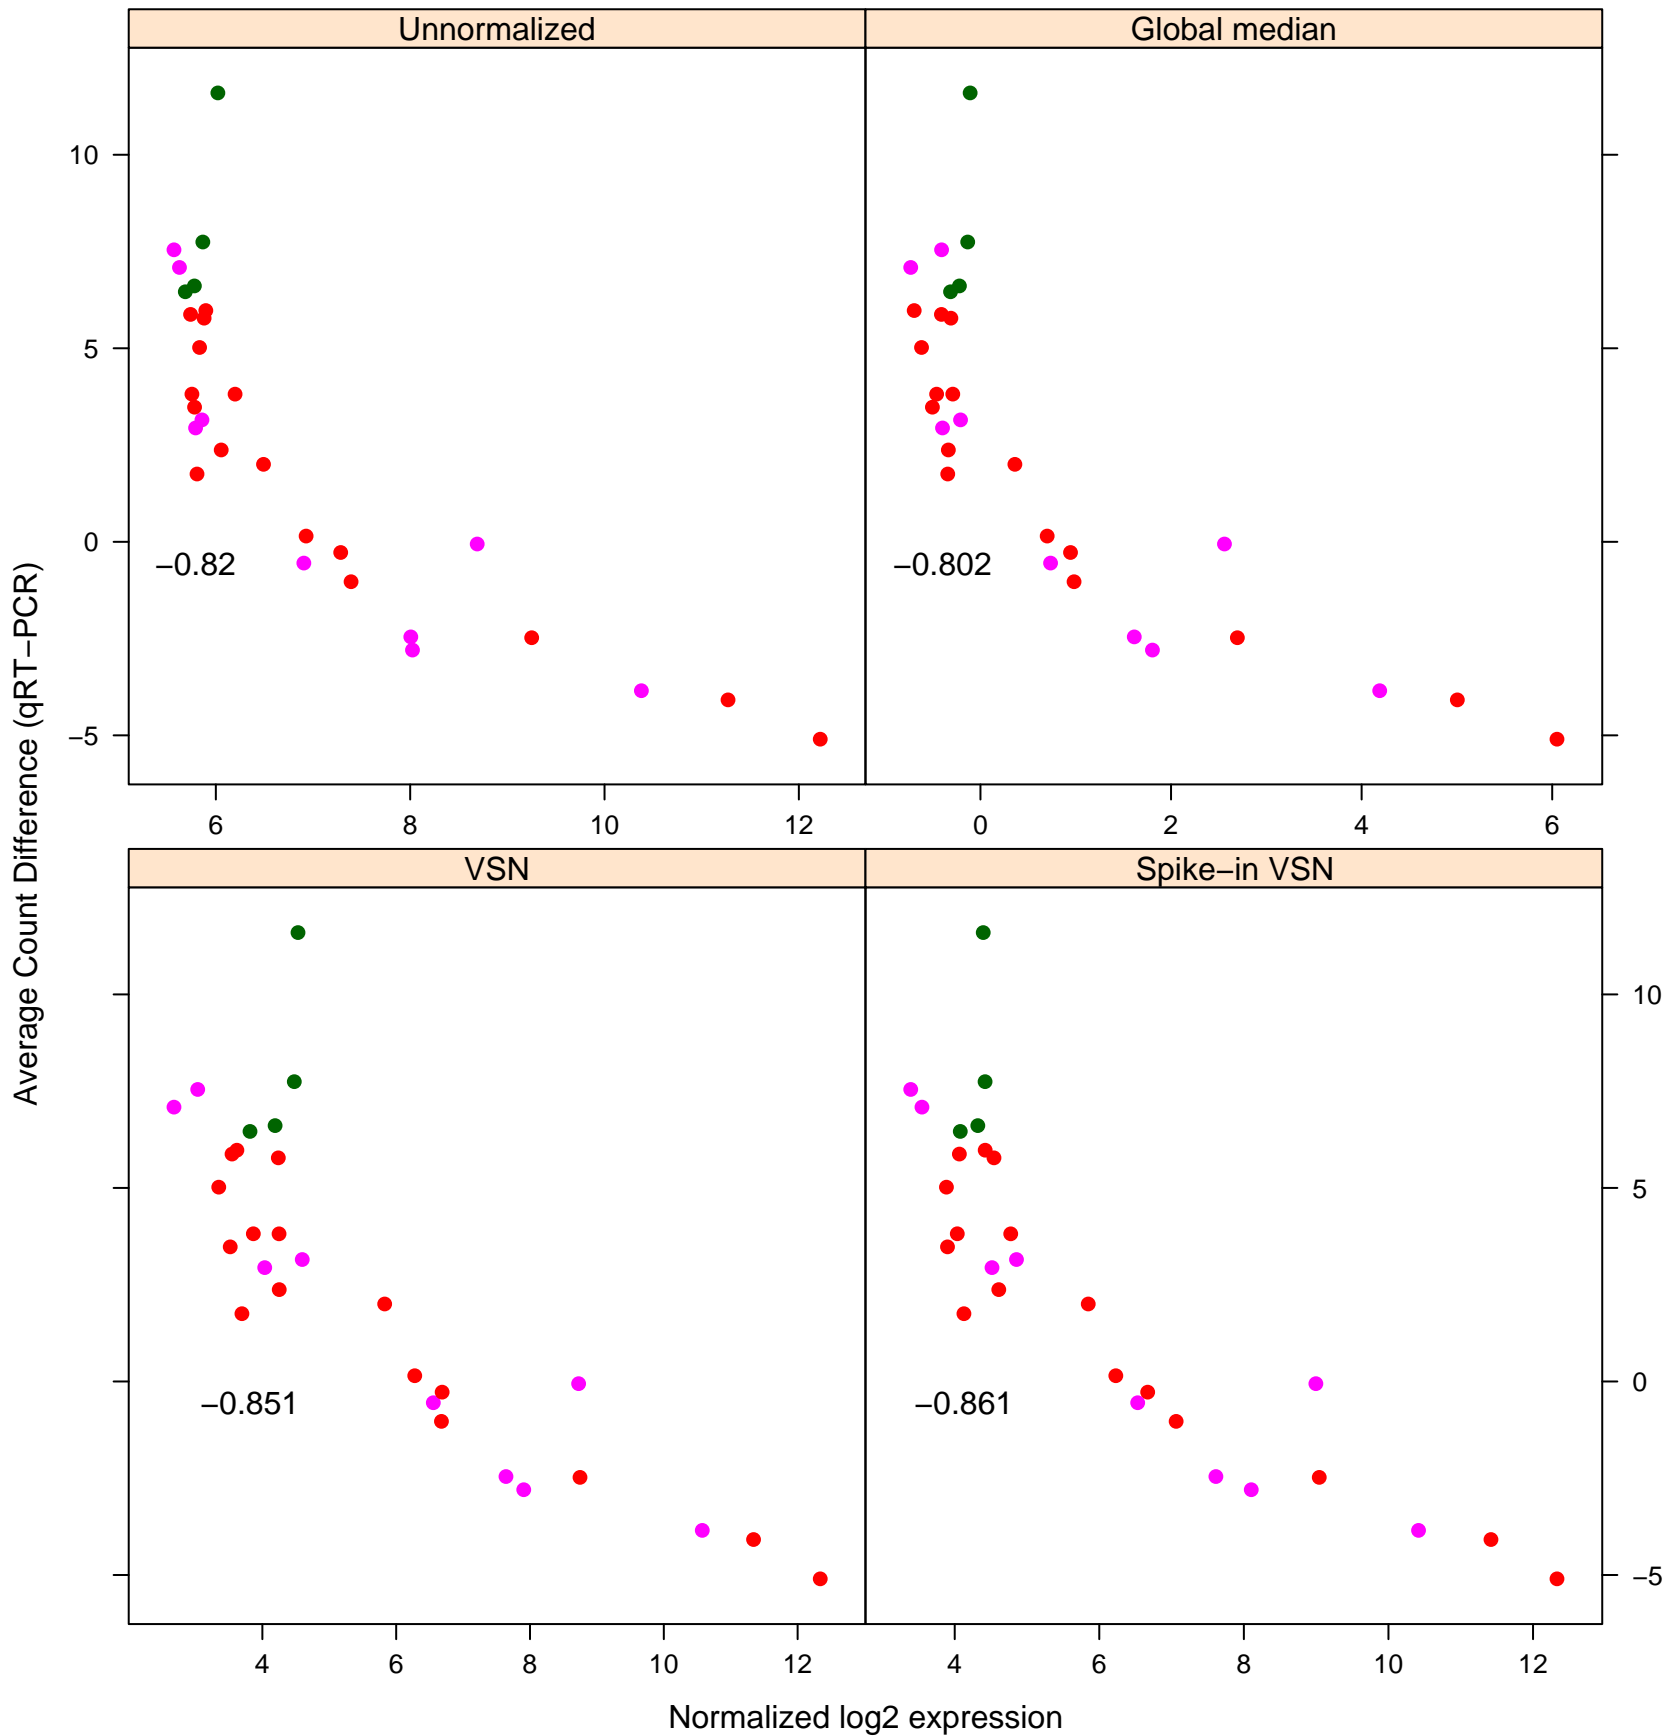

# hsa-miR-21

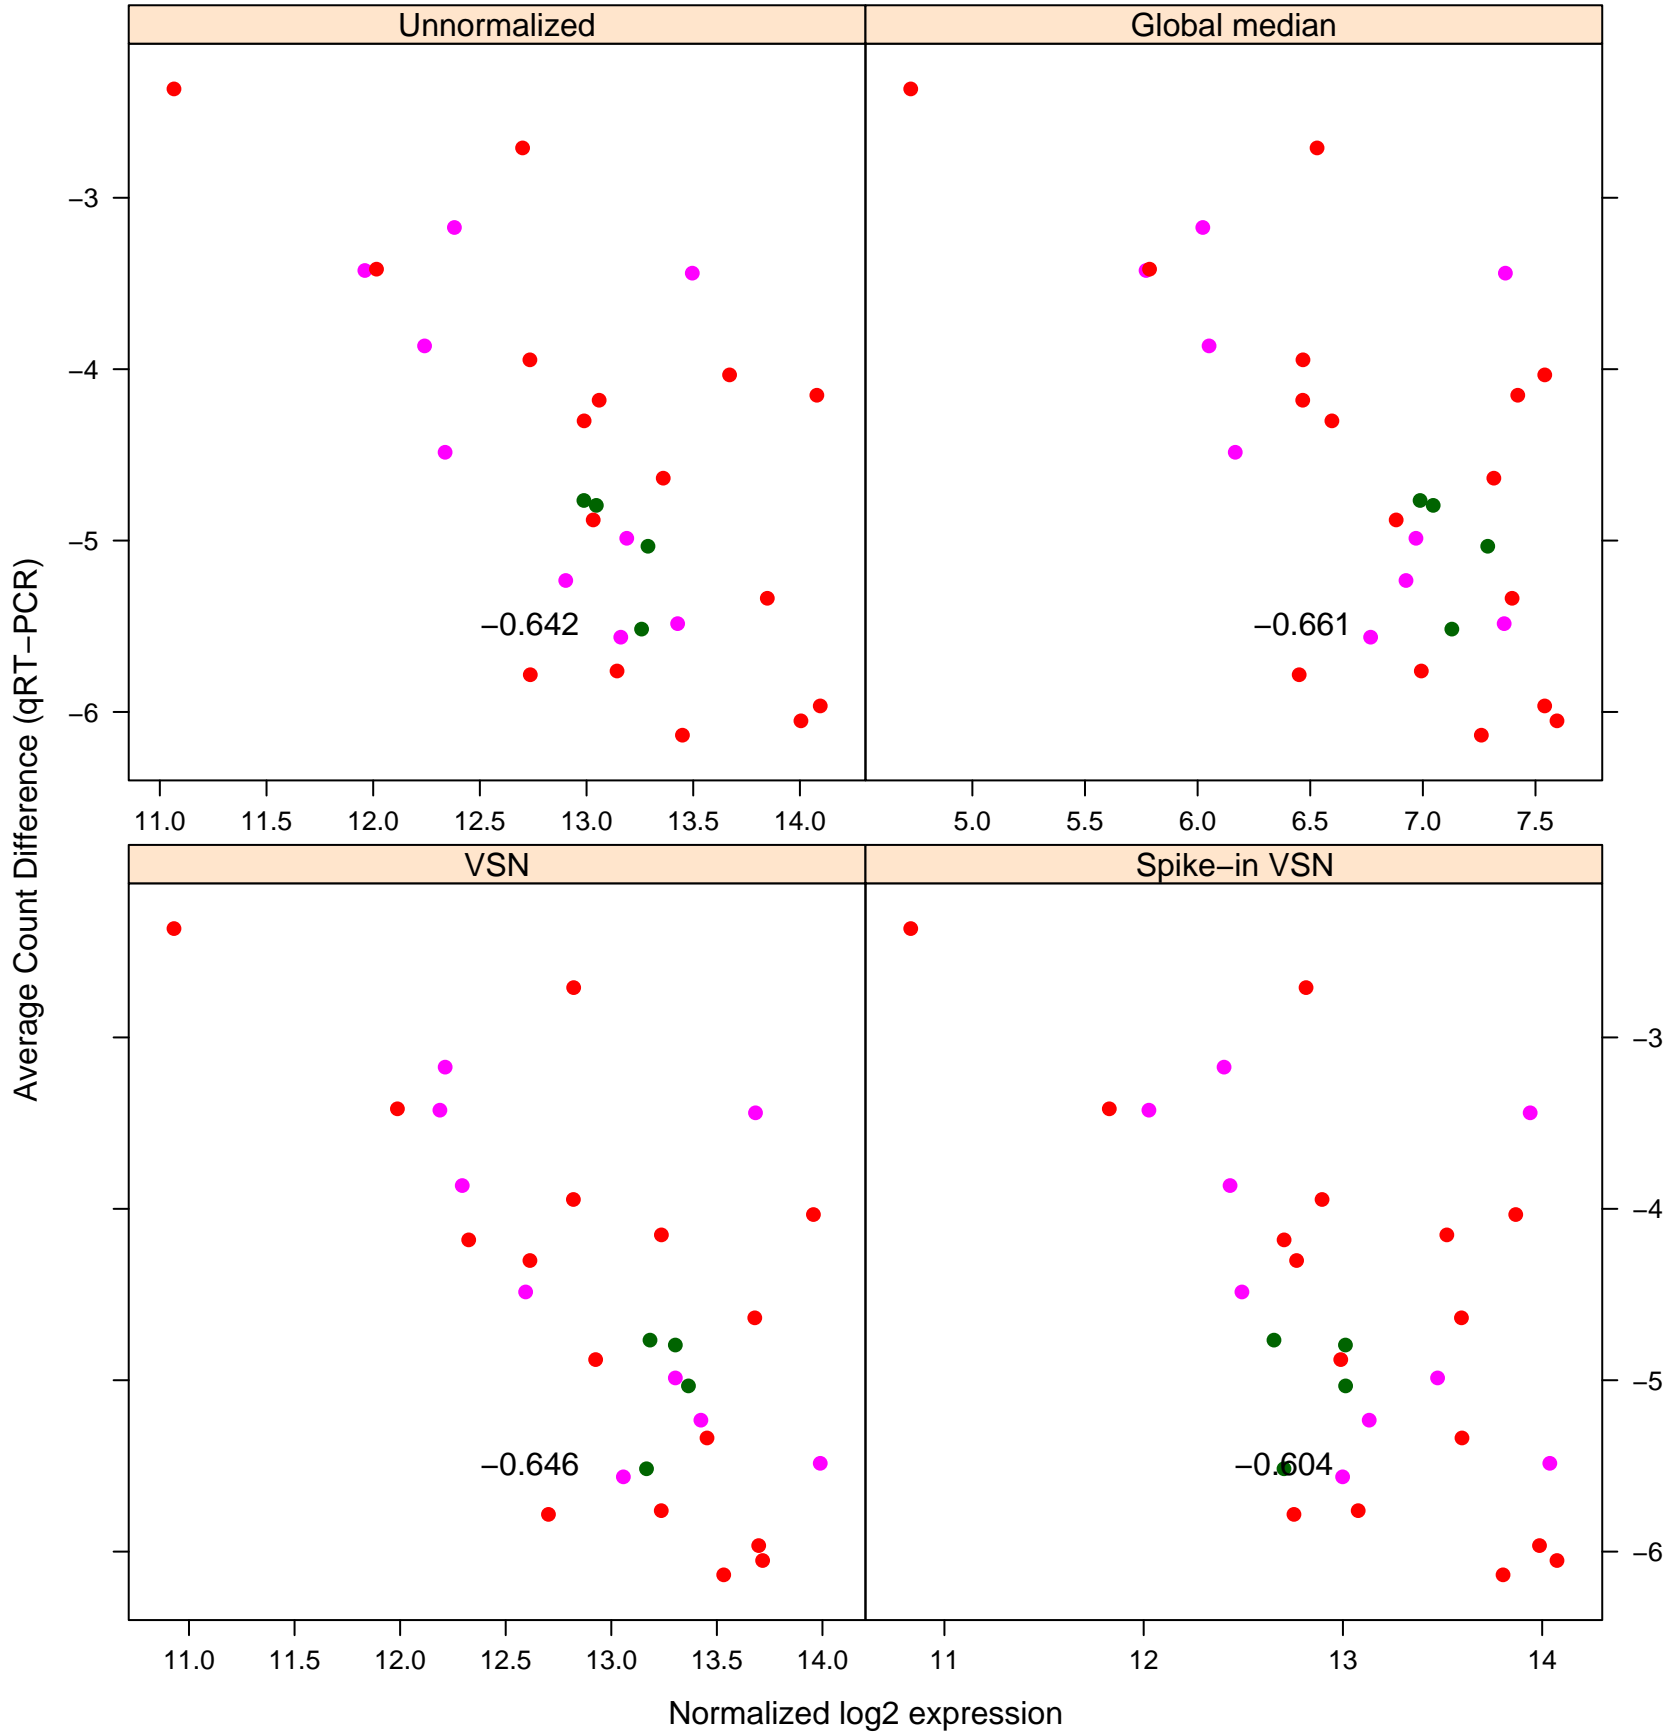

# hsa-miR-107

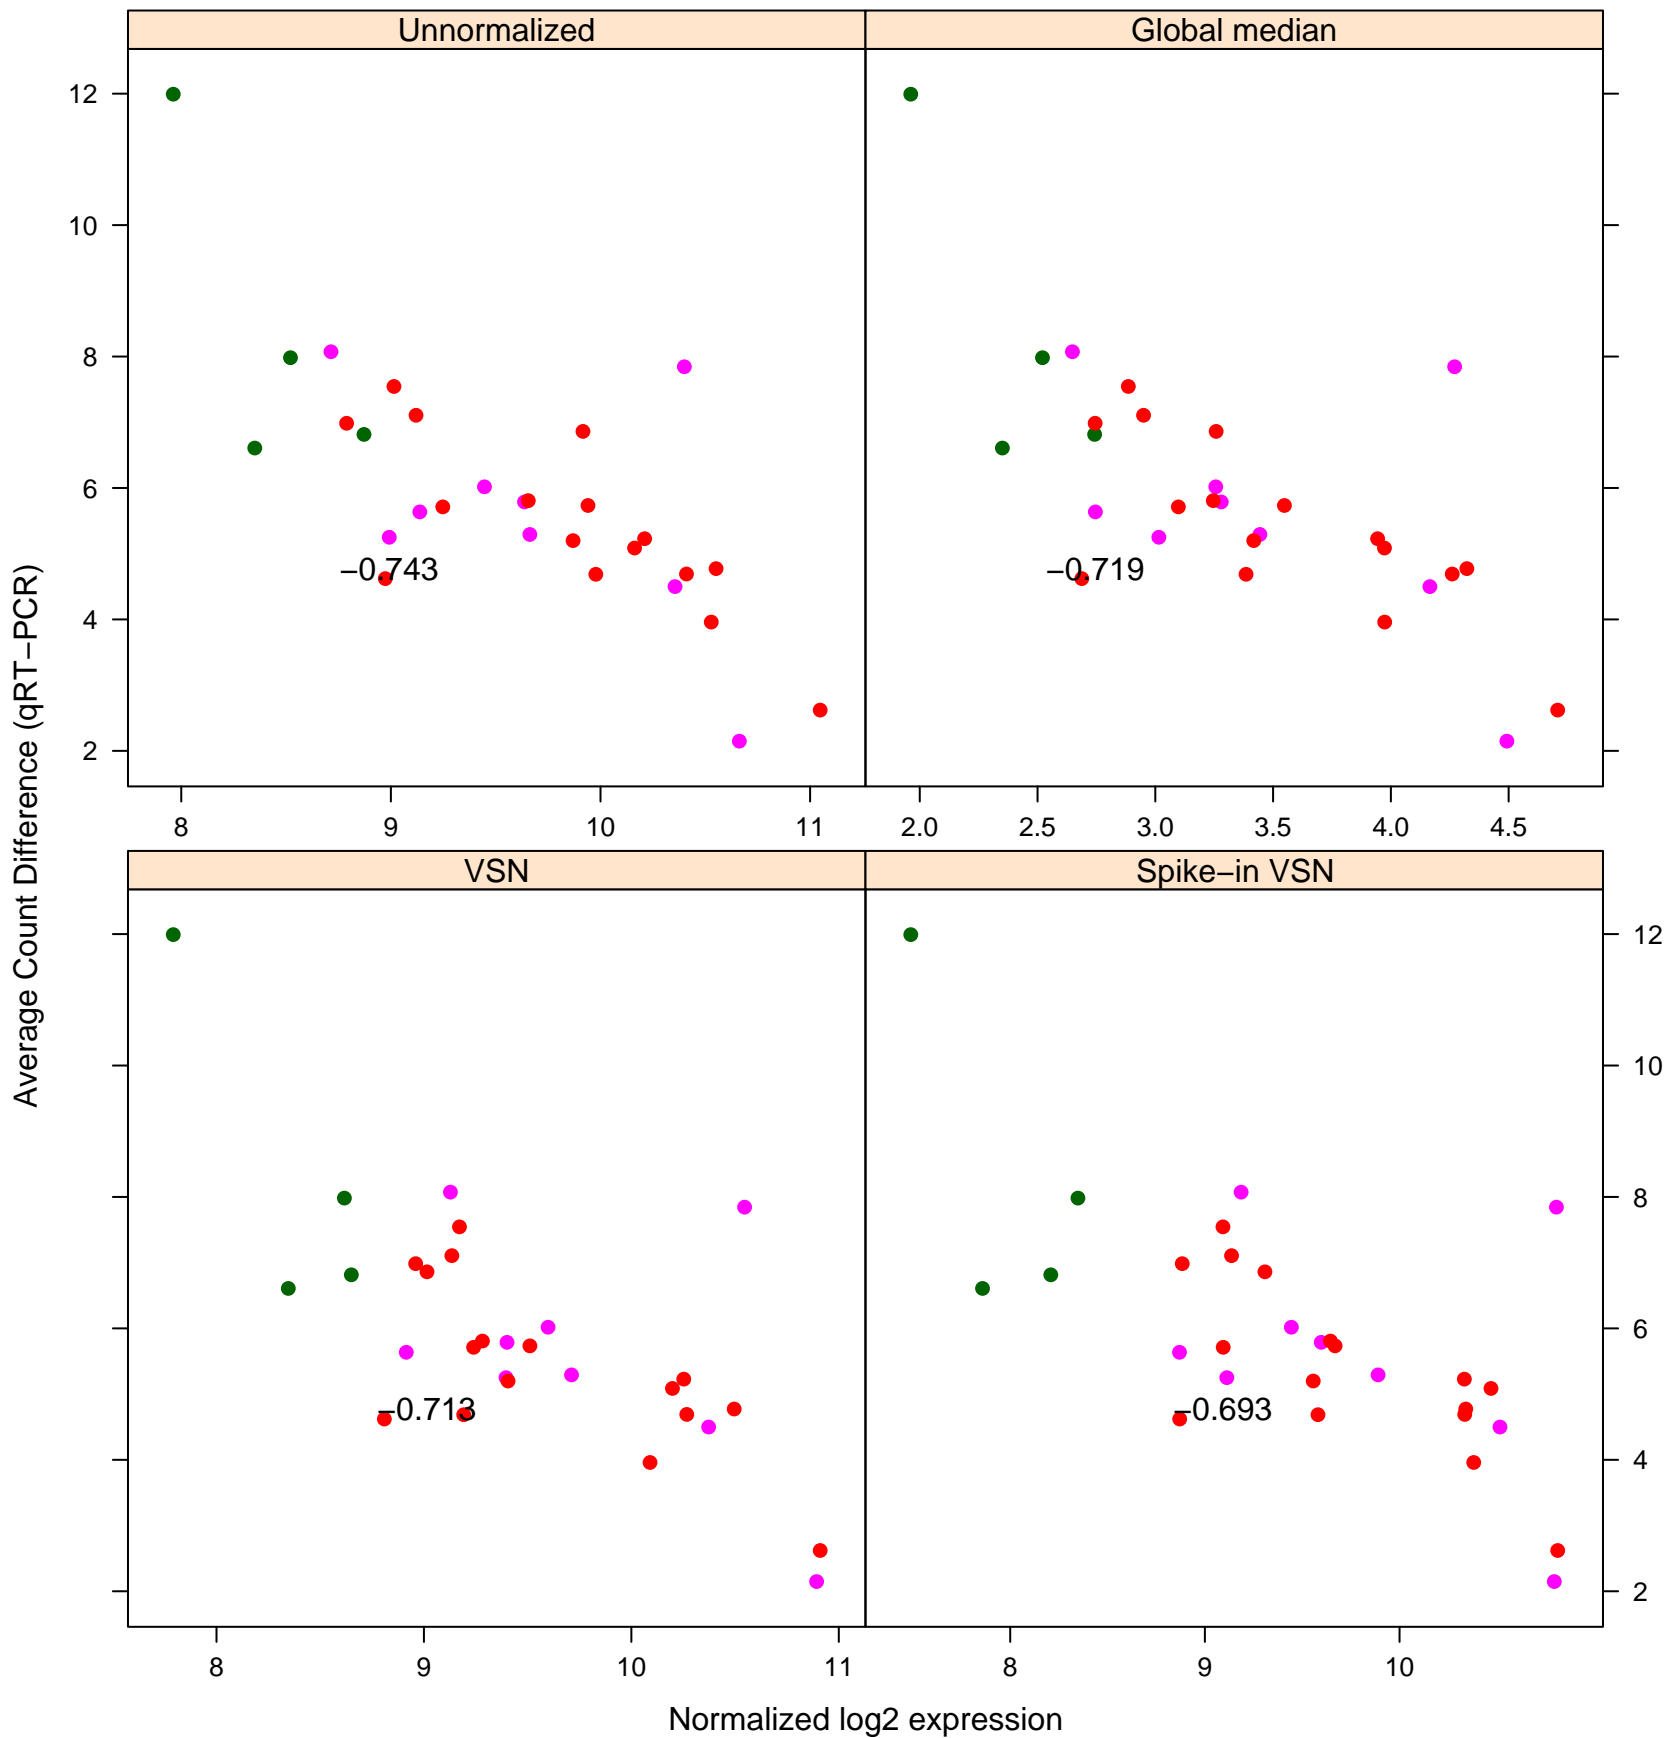



# hsa-miR-30a-5p

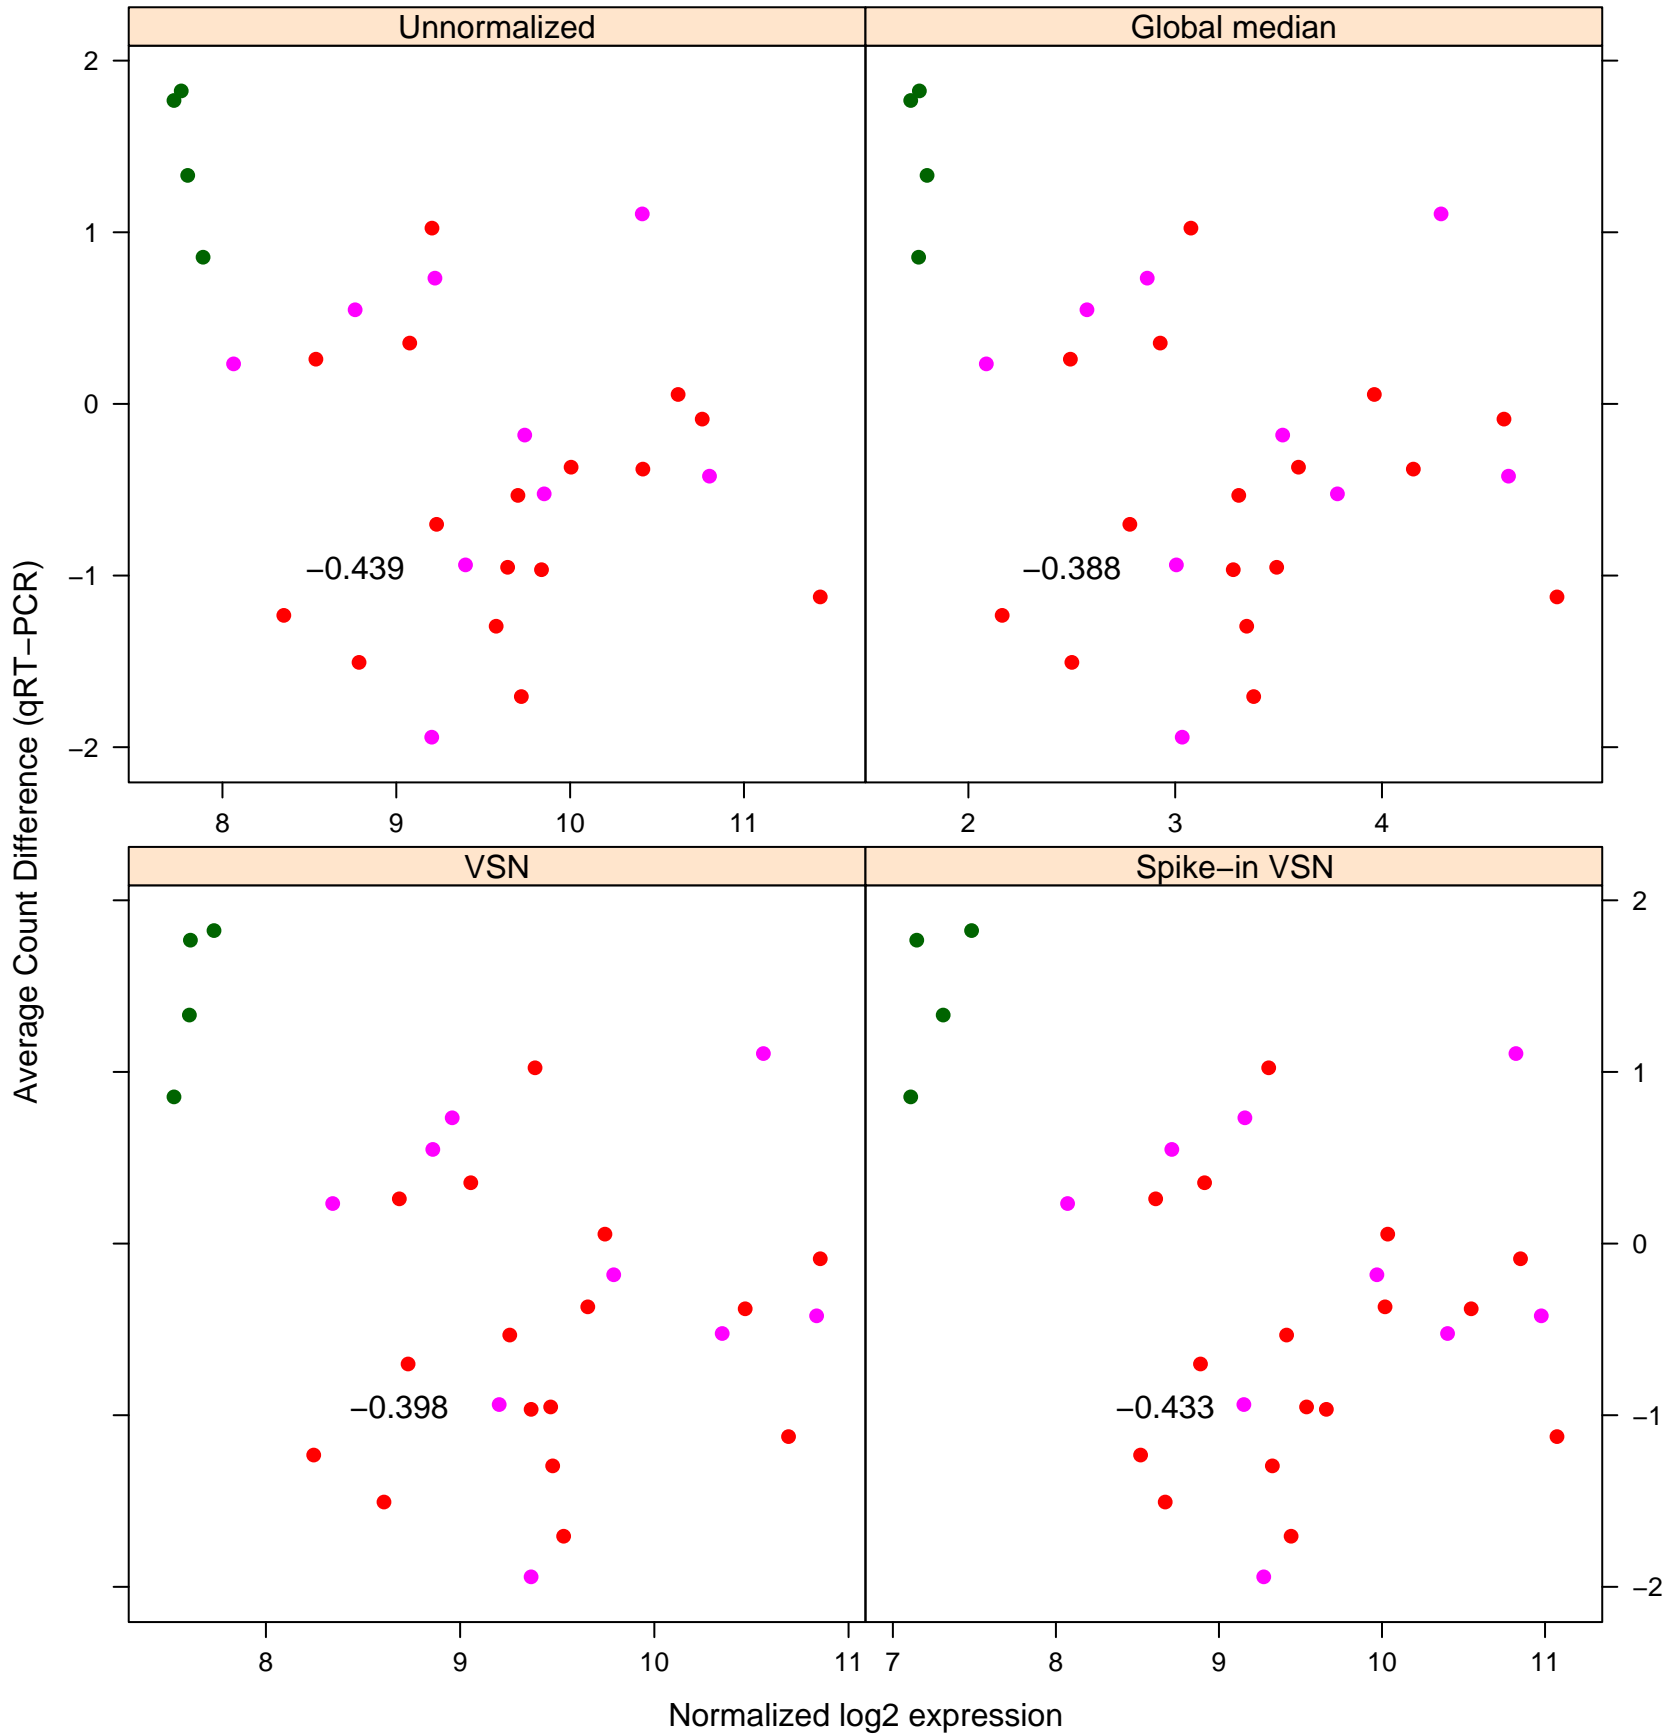

Supplement: gkn932_2.pdf [file gkn932_2.pdf]
